# Supplementary material for: Ring-opening 1,3-arylboration of arylcyclopropanes mediated by BCl3
Source: Royal Society of Chemistry journal article supplement (doi:10.1039/d0ra08151e), 2020-01-01

## Ring opening 1,3-arylboration of non-activated cyclopropanes mediated by BCl<sub>3</sub>

*Yuichi Kuboki, Mitsuhiro Arisawa, Kenichi Murai \**

Graduate School of Pharmaceutical Sciences, Osaka University,

1-6, Yamada-oka, Suita, Osaka, 565-0871 (Japan)

Tel: (+81) 6-6879-8227

E-mail: [murai@phs.osaka-u.ac.jp](mailto:murai@phs.osaka-u.ac.jp)

### Supporting Information

#### Table of Contents

|             |                                             |
|-------------|---------------------------------------------|
| 1. Page S2  | General                                     |
| 2. Page S2  | Preparation of arylcyclopropanes            |
| 3. Page S3  | Ring opening 1,3-arylboration (Table 2)     |
| 4. Page S9  | Synthesis of 4 and 5 (Scheme 2)             |
| 5. Page S10 | References                                  |
| 6. Page S11 | <sup>1</sup> H and <sup>13</sup> C NMR Data |

## 1. General

Melting points were measured by BÜCHI B-545 and all melting points were uncorrected.  $^1\text{H-NMR}$  and  $^{13}\text{C-NMR}$  spectra were measured by JEOL JNM-ECS 400, JEOL ECS 300 or JEOL JNM-LA 500 spectrometers with tetramethylsilane as an internal standard. IR spectra were recorded by Shimadzu FTIR 8400 (ATR). High resolution mass spectra and elemental analysis were performed by the Elemental Analysis Section of Osaka University. Column chromatography was performed with  $\text{SiO}_2$  (Merck Silica Gel 60 (230-400 mesh) or Kanto Chemical Silicagel 60 (spherical, 63-210  $\mu\text{m}$ )). Unless otherwise noted, materials were purchased from Aldrich Inc., Tokyo Chemical Industry, Kanto Kagaku, Wako Chemicals, and other commercial suppliers and were used without purification.

## 2. Preparation of arylcyclopanes

**1a** is commercially available. **1b**, **1c**, **1e**, and **1f** were prepared according to the literature procedure.<sup>1</sup> **1d** was prepared from 1-phenoxy-4-vinylbenzene.

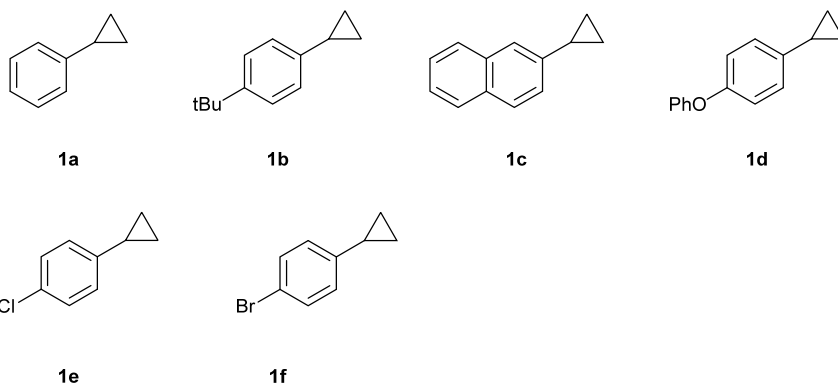

### Preparation of **1d**

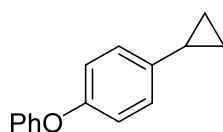

To a solution of 1-phenoxy-4-vinylbenzene<sup>2</sup> (2.0 g, 10.2 mmol) and  $\text{CH}_2\text{I}_2$  (2.7 ml, 33.5 mmol) in  $\text{CH}_2\text{Cl}_2$  (0.5 M, 20 ml) was added  $\text{Et}_3\text{Al}$  (1 M in hexane solution, 34.0 ml, 34.0 mmol) at room temperature and the resulting solution was stirred at 30 °C for 24 h. After completion of the reaction, the mixture was neutralized by 10%  $\text{NaOH}$  *aq*, and extracted with  $\text{AcOEt}$ . The organic layer was dried over  $\text{Na}_2\text{SO}_4$ , and the solvent was removed under reduced pressure. The residue was purified by  $\text{SiO}_2$  column chromatography (Hexane to Hexane/ $\text{AcOEt}$ = 100/1) to give compound **1d** (1.43 g, 67%) as a colorless oil.

$^1\text{H-NMR}$  (300 MHz,  $\text{CDCl}_3$ )  $\delta$  7.35-7.27 (m, 2H), 7.10-6.88 (m, 7H), 1.94-1.83 (m, 1H), 0.98-0.90 (m, 2H), 0.69-0.62 (m, 2H);  $^{13}\text{C-NMR}$  (100 MHz,  $\text{CDCl}_3$ )  $\delta$  157.8, 154.7, 138.9, 129.6, 126.9, 122.8, 119.1, 118.3, 14.8, 8.9; HRMS (MALDI-TOF) calcd for  $\text{C}_{15}\text{H}_{14}\text{O}$   $[\text{M}]^+$ : 210.1039, found 210.1035.

### 3. Ring-opening 1,3-arylboration (Table 2)

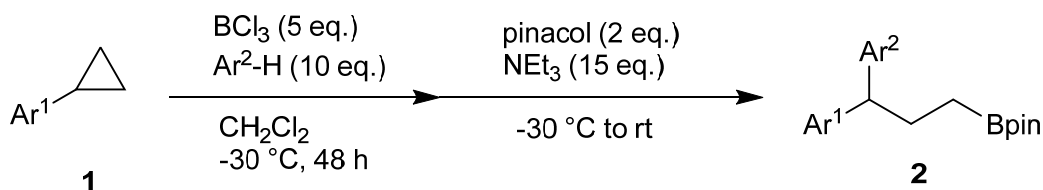

#### General procedure

To a solution of arylcyclopropane **1** (0.2 mmol) and arene (10 eq.) in CH<sub>2</sub>Cl<sub>2</sub> (1 M) was added BCl<sub>3</sub> (5 eq., 1 M in CH<sub>2</sub>Cl<sub>2</sub> solution) at -30 °C. After the mixture was stirred at -30 °C for 48 h, pinacol (2 eq.) and Et<sub>3</sub>N (15 eq.) solution in CH<sub>2</sub>Cl<sub>2</sub> (1.0 mL) was added to the mixture and the reaction mixture was then stirred 6 h at rt. The resulting solution was diluted with AcOEt and filtrated through a short pad of celite. The filtrate was concentrated under reduced pressure, and the residue was purified by SiO<sub>2</sub> column chromatography to give **2**. Some product were obtained as inseparable o:p mixture or α:β, and <sup>1</sup>H and <sup>13</sup>C NMR spectrum of major isomer was reported.

#### Compound 2a

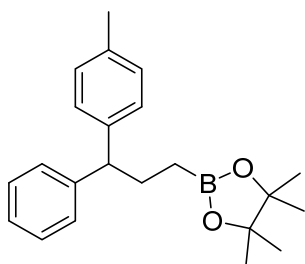

Reaction was carried out according to the general procedure with **1a** (23.4 mg, 0.198 mmol), toluene (0.21 ml, 2.0 mmol), BCl<sub>3</sub> (1.0 ml, 1.0 mmol, 1 M in CH<sub>2</sub>Cl<sub>2</sub> solution), pinacol (47.3 mg, 0.40 mmol), Et<sub>3</sub>N (0.42 ml, 3.0 mmol), and CH<sub>2</sub>Cl<sub>2</sub> (0.2 + 1.0 mL) to give compound **2a** (54.1 mg, 81%, >20:1) as colorless oil. SiO<sub>2</sub> Column chromatography: Hexane/AcOEt= 40/1.

<sup>1</sup>H-NMR (300 MHz, CDCl<sub>3</sub>): δ 7.28-7.20 (m, 4H), 7.17-7.03 (m, 5H), 3.80 (t, *J* = 7.7 Hz, 1H), 2.29 (s, 3H), 2.17-2.06 (m, 2H), 1.22 (s, 12H), 0.73 (t, *J* = 8.1 Hz, 2H); <sup>13</sup>C-NMR (100 MHz, CDCl<sub>3</sub>) δ 145.2, 142.0, 135.2, 128.9, 128.2, 127.9, 127.8, 125.8, 82.8, 53.2, 30.0, 24.7, 20.9; HRMS (MALDI-TOF): calcd for C<sub>22</sub>H<sub>29</sub>BO<sub>2</sub>Na [M+Na]<sup>+</sup>: 359.2153, found 359.2153.

## Compound 2b

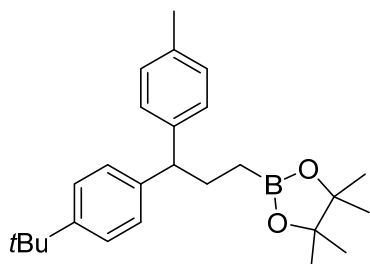

Reaction was carried out according to the general procedure with **1b** (35.4 mg, 0.203 mmol), toluene (0.21 ml, 2.0 mmol),  $\text{BCl}_3$  (1.0 ml, 1.0 mmol, 1 M in  $\text{CH}_2\text{Cl}_2$  solution), pinacol (48.0 mg, 0.42 mmol),  $\text{Et}_3\text{N}$  (0.42 ml, 3.0 mmol), and  $\text{CH}_2\text{Cl}_2$  (0.2 + 1.0 mL) to give compound **2b** (70.9 mg, 90%, >20:1) as colorless oil.  $\text{SiO}_2$  Column chromatography: Hexane/AcOEt= 40/1.

$^1\text{H-NMR}$  (300 MHz,  $\text{CDCl}_3$ )  $\delta$  7.27-7.23 (m, 2H), 7.17-7.11 (m, 4H), 7.06 (d,  $J = 7.9$  Hz, 2H), 3.76 (t,  $J = 7.7$  Hz, 1H), 2.27 (s, 3H), 2.11 (q,  $J = 8.0$  Hz, 2H), 1.26 (s, 9H), 1.21 (s, 12H), 0.73 (t,  $J = 8.1$  Hz, 2H);  $^{13}\text{C-NMR}$  (125 MHz,  $\text{CDCl}_3$ )  $\delta$  148.4, 142.24, 142.20, 135.2, 128.9, 127.9, 127.4, 125.1, 82.8, 52.8, 34.2, 31.4, 30.1, 24.8, 21.0; HRMS (MALDI-TOF) calcd for  $\text{C}_{26}\text{H}_{37}\text{BO}_2\text{Na}$   $[\text{M}+\text{Na}]^+$ : 415.2779, found 415.2793.

## Compound 2c

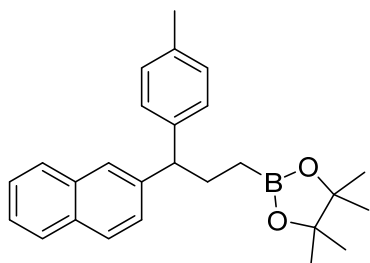

Reaction was carried out according to the general procedure with **1c** (33.9 mg, 0.201 mmol), toluene (0.21 ml, 2.0 mmol),  $\text{BCl}_3$  (1.0 ml, 1.0 mmol, 1 M in  $\text{CH}_2\text{Cl}_2$  solution), pinacol (47.0 mg, 0.40 mmol),  $\text{Et}_3\text{N}$  (0.42 ml, 3.0 mmol), and  $\text{CH}_2\text{Cl}_2$  (0.2 + 1.0 mL) to give compound **2c** (38.3 mg, 49%, >20:1) as colorless oil.  $\text{SiO}_2$  Column chromatography: Hexane/AcOEt= 40/1.

$^1\text{H-NMR}$  (500 MHz,  $\text{CDCl}_3$ )  $\delta$  7.78 (d,  $J = 7.5$  Hz, 1H), 7.75 (d,  $J = 7.5$  Hz, 1H), 7.72-7.69 (m, 2H), 7.44-7.37 (m, 2H), 7.32 (dd,  $J = 8.5, 1.5$  Hz, 1H), 7.16 (d,  $J = 8.0$  Hz, 2H), 7.07 (d,  $J = 8.0$  Hz, 2H), 3.97 (t,  $J = 7.5$  Hz, 1H), 2.28 (s, 3H), 2.27-2.18 (m, 2H), 1.22 (s, 12H), 0.78 (t,  $J = 8.0$  Hz, 2H);  $^{13}\text{C-NMR}$  (100 MHz,  $\text{CDCl}_3$ )  $\delta$  142.7, 141.9, 135.4, 133.5, 132.1, 129.0, 128.0, 127.9, 127.7, 127.5, 127.0, 126.0, 125.7, 125.2, 82.9, 53.2, 29.7, 24.8, 21.0; HRMS (MALDI-TOF) calcd for  $\text{C}_{26}\text{H}_{31}\text{BO}_2\text{Na}$   $[\text{M}+\text{Na}]^+$ : 409.2309, found 409.2320.

### Compound 2d

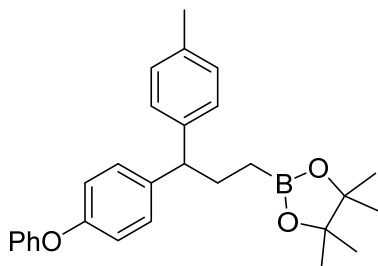

Reaction was carried out according to the general procedure with **1d** (46.6 mg, 0.222 mmol), toluene (0.23 ml, 2.2 mmol),  $\text{BCl}_3$  (1.1 ml, 1.1 mmol, 1M in  $\text{CH}_2\text{Cl}_2$  solution), pinacol (51.7 mg, 0.44 mmol),  $\text{Et}_3\text{N}$  (0.48 ml, 3.4 mmol), and  $\text{CH}_2\text{Cl}_2$  (0.22 + 1.0 mL) to give compound **1d** (15.3 mg, 16%, >20:1) as pale yellow oil.  $\text{SiO}_2$  Column chromatography: Hexane/AcOEt= 40/1.

$^1\text{H-NMR}$  (400 MHz,  $\text{CDCl}_3$ )  $\delta$  7.33-7.28 (m, 2H), 7.21-7.17 (m, 2H), 7.16-7.04 (m, 5H), 6.99-6.95 (m, 2H), 6.93-6.87 (m, 2H), 3.79 (t,  $J = 8.0$  Hz, 1H), 2.30 (s, 3H), 2.11 (td,  $J = 8.0, 8.0$  Hz, 2H), 1.24 (s, 12H), 0.74 (t,  $J = 8.0$  Hz, 2H);  $^{13}\text{C-NMR}$  (100 MHz,  $\text{CDCl}_3$ )  $\delta$  157.5, 155.1, 142.1, 140.3, 135.4, 129.6, 129.1, 129.0, 127.8, 122.9, 118.8, 118.6, 82.9, 52.6, 30.2, 24.8, 21.0; HRMS (MALDI-TOF) calcd for  $\text{C}_{28}\text{H}_{33}\text{BO}_3\text{Na}$   $[\text{M}+\text{Na}]^+$ : 451.2415, found 451.2424.

### Compound 2e

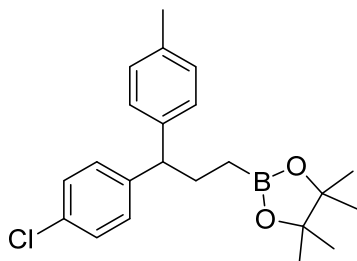

Reaction was carried out according to the general procedure with **1e** (30.8 mg, 0.201 mmol), toluene (0.21 ml, 2.0 mmol),  $\text{BCl}_3$  (1.0 ml, 1.0 mmol, 1 M in  $\text{CH}_2\text{Cl}_2$  solution), pinacol (47.0 mg, 0.41 mmol),  $\text{Et}_3\text{N}$  (0.42 ml, 3.0 mmol), and  $\text{CH}_2\text{Cl}_2$  (0.2 + 1.0 mL) to give compound **2e** (52.9 mg, 71%, >20:1) as colorless oil.  $\text{SiO}_2$  Column chromatography: Hexane/AcOEt= 40/1.

$^1\text{H-NMR}$  (400 MHz,  $\text{CDCl}_3$ )  $\delta$  7.23-7.19 (m, 2H), 7.17-7.13 (m, 2H), 7.08 (bs, 4H), 3.77 (t,  $J = 7.8$  Hz, 1H), 2.29 (s, 3H), 2.08 (td,  $J = 8.2, 5.6$  Hz, 2H), 1.22 (s, 12H), 0.71 (dd,  $J = 9.4, 7.0$  Hz, 2H);  $^{13}\text{C-NMR}$  (100 MHz,  $\text{CDCl}_3$ )  $\delta$  143.8, 141.5, 135.6, 131.5, 129.3, 129.1, 128.4, 127.8, 83.0, 52.5, 29.9, 24.8, 21.0; HRMS (MALDI-TOF) calcd for  $\text{C}_{22}\text{H}_{28}\text{BClO}_2\text{Na}$   $[\text{M}+\text{Na}]^+$ : 393.1763, found 393.1756

### Compound 2f

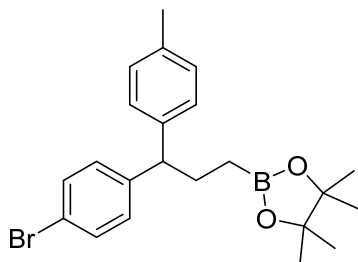

Reaction was carried out according to the general procedure with **1f** (43.2 mg, 0.219 mmol), toluene (0.23 ml, 2.2 mmol), BCl<sub>3</sub> (1.1 ml, 1.1 mmol, 1M in CH<sub>2</sub>Cl<sub>2</sub> solution), pinacol (52.3 mg, 0.44 mmol), Et<sub>3</sub>N (0.46 ml, 3.3 mmol), and CH<sub>2</sub>Cl<sub>2</sub> (0.22 + 1.0 mL) to give compound **2f** (74.1 mg, 81%, 13:1) as colorless oil. SiO<sub>2</sub> Column chromatography: Hexane/AcOEt= 40/1.

<sup>1</sup>H-NMR (300 MHz, CDCl<sub>3</sub>) δ 7.38-7.33 (m, 2H), 7.12-7.06 (m, 6H), 3.76 (t, *J* = 7.7 Hz, 1H), 2.29 (s, 3H), 2.13-2.03 (m, 2H), 1.22 (s, 12H), 0.75-0.68 (m, 2H); <sup>13</sup>C-NMR (100 MHz, CDCl<sub>3</sub>) δ 144.4, 141.4, 135.7, 131.3, 129.8, 129.1, 127.8, 119.6, 83.0, 52.6, 29.8, 24.9, 21.0; HRMS (MALDI-TOF) calcd for C<sub>22</sub>H<sub>28</sub>BBro<sub>2</sub>Na [M+Na]<sup>+</sup>: 437.1258, found 437.1251.

### Compound 2g

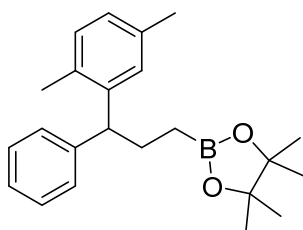

Reaction was carried out according to the general procedure with **1a** (23.5 mg, 0.199 mmol), *p*-xylene (0.25 ml, 2.0 mmol), BCl<sub>3</sub> (1.0 ml, 1.0 mmol, 1M in CH<sub>2</sub>Cl<sub>2</sub> solution), pinacol (47.3 mg, 0.40 mmol), Et<sub>3</sub>N (0.42 ml, 3.0 mmol), and CH<sub>2</sub>Cl<sub>2</sub> (0.2 + 1.0 mL) to give compound **2g** (50.8 mg, 73%) as pale yellow oil. SiO<sub>2</sub> Column chromatography: Hexane/AcOEt= 30/1.

<sup>1</sup>H-NMR (400 MHz, CDCl<sub>3</sub>) δ 7.25-7.18 (m, 6H), 7.16-7.11 (m, 2H), 4.03 (t, *J* = 7.90 Hz, 1H), 2.32 (s, 3H), 2.22 (s, 3H), 2.11 (td, *J* = 7.9, 7.9 Hz, 2H), 1.24 (s, 12H), 0.78 (t, *J* = 7.9 Hz, 2H); <sup>13</sup>C-NMR (100 MHz, CDCl<sub>3</sub>) δ 144.7, 142.7, 135.1, 133.2, 130.2, 128.4, 128.1, 127.4, 126.5, 125.7, 82.9, 49.0, 30.2, 24.8, 21.3, 19.5; HRMS (MALDI-TOF) calcd for C<sub>23</sub>H<sub>31</sub>BO<sub>2</sub>Na [M+Na]<sup>+</sup>: 373.2309, found 373.2320.

### Compound 2h

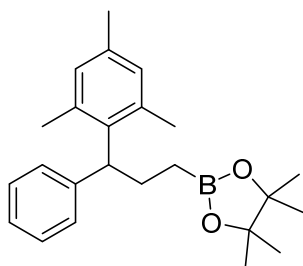

Reaction was carried out according to the general procedure with **1a** (23.5 mg, 0.199 mmol), mesitylene (0.28 ml, 2.0 mmol),  $\text{BCl}_3$  (1.0 ml, 1.0 mmol, 1M in  $\text{CH}_2\text{Cl}_2$  solution), pinacol (47.1 mg, 0.40 mmol),  $\text{Et}_3\text{N}$  (0.42 ml, 3.0 mmol), and  $\text{CH}_2\text{Cl}_2$  (0.2 + 1.0 mL) to give compound **2h** (63.3 mg, 87%) as pale yellow oil.  $^1\text{H-NMR}$  (500 MHz,  $\text{CDCl}_3$ , 60 °C)  $\delta$  7.24-7.15 (m, 4H), 7.11-7.08 (m, 1H), 6.77 (s, 2H), 4.45 (dd,  $J = 9.0$ , 6.5 Hz, 1H), 2.45-2.08 (m, 11H), 1.21 (s, 12H), 0.85-0.67 (m, 2H);  $^{13}\text{C-NMR}$  (125 MHz,  $\text{CDCl}_3$ , 60 °C)  $\delta$  144.9, 138.3, 137.2, 135.2, 130.0, 128.0, 127.5, 125.2, 83.0, 45.9, 25.7, 24.90, 24.87, 21.4, 20.7; HRMS (MALDI-TOF) calcd for  $\text{C}_{24}\text{H}_{33}\text{BO}_2\text{Na}$   $[\text{M}+\text{Na}]^+$ : 387.2466, found 387.2430.

### Compound 2i

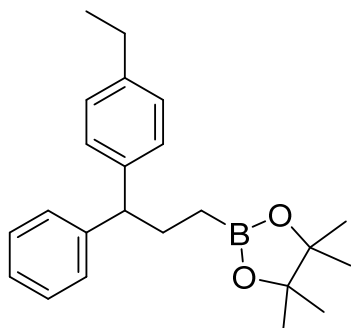

Reaction was carried out according to the general procedure with **1a** (23.5 mg, 0.199 mmol), ethylbenzene (0.25 ml, 2.0 mmol),  $\text{BCl}_3$  (1.0 ml, 1.0 mmol, 1M in  $\text{CH}_2\text{Cl}_2$  solution), pinacol (47.2 mg, 0.40 mmol),  $\text{Et}_3\text{N}$  (0.42 ml, 3.0 mmol), and  $\text{CH}_2\text{Cl}_2$  (0.2 + 1.0 mL) to give compound **2i** (53.2 mg, 76%, >20:1) as pale yellow oil.  $\text{SiO}_2$  Column chromatography: Hexane/AcOEt= 40/1.

$^1\text{H-NMR}$  (300 MHz,  $\text{CDCl}_3$ )  $\delta$  7.26-7.06 (m, 9H), 3.80 (t,  $J = 7.8$  Hz, 1H), 2.58 (q,  $J = 7.5$  Hz, 2H), 2.08-2.16 (m, 2H), 1.27-1.16 (m, 15H), 0.73 (t,  $J = 8.3$  Hz, 2H),  $^{13}\text{C-NMR}$  (125 MHz,  $\text{CDCl}_3$ )  $\delta$  145.3, 142.3, 141.7, 128.2, 128.0, 127.9, 127.7, 125.8, 82.9, 53.3, 30.0, 28.3, 24.8, 15.5; HRMS (MALDI-TOF) calcd for  $\text{C}_{23}\text{H}_{30}\text{BO}_2$   $[\text{M}-\text{H}]^+$ : 349.2333, found 349.2339.

### Compound 2j

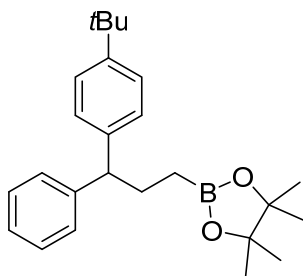

Reaction was carried out according to the general procedure with **1a** (24.1 mg, 0.204 mmol), *t*-butylbenzene (0.31 ml, 2.0 mmol), BCl<sub>3</sub> (1.0 ml, 1.0 mmol, 1M in CH<sub>2</sub>Cl<sub>2</sub> solution), pinacol (48.2 mg, 0.41 mmol), Et<sub>3</sub>N (0.42 ml, 3.0 mmol), and CH<sub>2</sub>Cl<sub>2</sub> (0.2 + 1.0 mL) to give compound **2j** (55.4 mg, 72%, >20:1) as colorless oil. SiO<sub>2</sub> Column chromatography: Hexane/AcOEt= 40/1.

<sup>1</sup>H-NMR (400 MHz, CDCl<sub>3</sub>) δ 7.30-7.24 (m, 6H), 7.20-7.13 (m, 3H), 3.82 (t, *J* = 8.0 Hz, 1H), 2.19-2.10 (m, 2H), 1.29 (s, 9H), 1.24 (s, 12H), 0.75 (t, *J* = 8.0 Hz, 2H); <sup>13</sup>C-NMR (100 MHz, CDCl<sub>3</sub>) δ 148.5, 145.2, 142.0, 128.2, 128.1, 127.5, 125.9, 125.1, 82.9, 53.3, 34.3, 31.4, 30.1, 24.8; HRMS (MALDI-TOF) calcd for C<sub>25</sub>H<sub>35</sub>BO<sub>2</sub>Na [M+Na]<sup>+</sup>: 401.2622, found 401.2627.

### Compound 2k

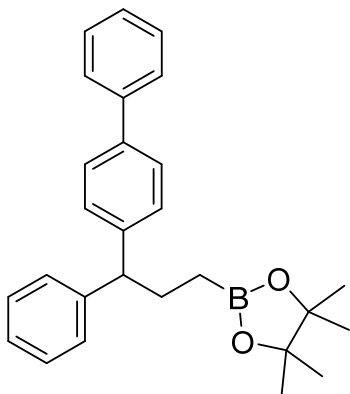

Reaction was carried out according to the general procedure with **1a** (23.6 mg, 0.200 mmol), biphenyl (308.4 mg, 2.0 mmol), BCl<sub>3</sub> (1.0 ml, 1.0 mmol, 1M in CH<sub>2</sub>Cl<sub>2</sub> solution), pinacol (47.4 mg, 0.40 mmol), Et<sub>3</sub>N (0.42 ml, 3.0 mmol), and CH<sub>2</sub>Cl<sub>2</sub> (0.2 + 1.0 mL) to give compound **2k** (46.2 mg, 58%, >20:1) as pale yellow oil. SiO<sub>2</sub> Column chromatography: Hexane/AcOEt= 40/1.

<sup>1</sup>H-NMR (400 MHz, CDCl<sub>3</sub>) δ 7.57-7.46 (m, 4H), 7.43-7.37 (m, 2H), 7.33-7.24 (m, 7H), 7.19-7.14 (m, 1H), 3.88 (t, *J* = 7.8 Hz, 1H), 2.22-2.14 (m, 2H), 1.23 (s, 12H), 0.78 (t, *J* = 8.2 Hz, 2H); <sup>13</sup>C-NMR (100 MHz, CDCl<sub>3</sub>) δ 144.9, 144.2, 141.0, 138.8, 128.6, 128.4, 128.3, 128.0, 127.0, 126.96, 126.93, 126.0, 83.0, 53.3, 30.0, 24.8; HRMS (MALDI-TOF) calcd for C<sub>27</sub>H<sub>31</sub>BO<sub>2</sub>Na [M+Na]<sup>+</sup>: 421.2309, found 421.2307.



## Compound 2l

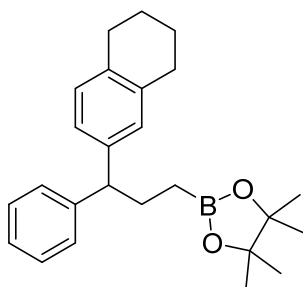

Reaction was carried out according to the general procedure with **1a** (24.4 mg, 0.206 mmol), tetrahydronaphthalene (0.27 ml, 2.0 mmol),  $\text{BCl}_3$  (1.0 ml, 1.0 mmol, 1M in  $\text{CH}_2\text{Cl}_2$  solution), pinacol (47.4 mg, 0.40 mmol),  $\text{Et}_3\text{N}$  (0.42 ml, 3.0 mmol), and  $\text{CH}_2\text{Cl}_2$  (0.2 + 1.0 mL) to give compound **2l** (64.3 mg, 83%, 14:1) as pale yellow oil.  $\text{SiO}_2$  Column chromatography: Hexane/AcOEt= 40/1.

$^1\text{H-NMR}$  (400 MHz,  $\text{CDCl}_3$ )  $\delta$  7.26-7.23 (m, 5H), 7.17-7.12 (m, 1H), 6.96-6.94 (m, 2H), 6.93 (s, 1H), 3.76 (t,  $J = 8.0$  Hz, 1H), 2.74-2.67 (m, 4H), 2.12 (td,  $J = 8.0, 8.0$  Hz, 2H), 1.78-1.73 (m, 4H), 1.23 (s, 12H), 0.74 (t,  $J = 8.0$  Hz, 2H);  $^{13}\text{C-NMR}$  (100 MHz,  $\text{CDCl}_3$ )  $\delta$  145.3, 142.1, 136.8, 134.6, 129.0, 128.6, 128.2, 128.0, 125.8, 125.0, 82.9, 53.4, 30.0, 29.5, 29.0, 24.8, 23.3, 23.2; HRMS (MALDI-TOF) calcd for  $\text{C}_{25}\text{H}_{33}\text{BO}_2\text{Na}$   $[\text{M}+\text{Na}]^+$ : 399.2466, found 399.2473.

## 4. Synthesis of 4 and 5 (Scheme 2)

### Compound 4<sup>3</sup>

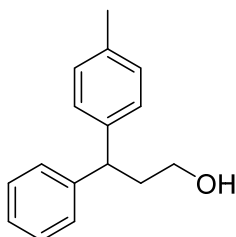

To a solution of aryl cyclopropane **1a** (23.6 mg, 0.200 mmol) and toluene (0.21 ml, 2.0 mmol) in  $\text{CH}_2\text{Cl}_2$  (0.2 ml, 1 M) was added  $\text{BCl}_3$  (1 M in  $\text{CH}_2\text{Cl}_2$  solution, 1.0 ml, 1.0 mmol) at  $-30$  °C. After the mixture was stirred at  $-30$  °C for 48 h, a solution of 2 M  $\text{NaOH}/30\%$   $\text{H}_2\text{O}_2$  (1.5 mL, 1:1 v/v) was added to a mixture at  $-30$  °C. The reaction mixture was allowed to warm to  $0$  °C and further stirred for 3 h. After the completion of the reaction, the resulting mixture was diluted with AcOEt and extracted with AcOEt. The organic layer was washed with brine, dried over  $\text{Na}_2\text{SO}_4$ , and concentrated in vacuo. The residue was purified by  $\text{SiO}_2$  column chromatography (Hexane/AcOEt= 10/1 to 3/1) to give **4** as a colorless oil (39.8 mg, 88%, 20:1).

$^1\text{H-NMR}$  (400 MHz,  $\text{CDCl}_3$ )  $\delta$  7.30-7.06 (m, 9H), 4.09 (t,  $J = 7.8$  Hz, 1H), 3.60 (t,  $J = 6.4$  Hz, 2H), 2.35-2.27 (m, 5H), 1.48-1.37 (1H);  $^{13}\text{C-NMR}$  (100 MHz,  $\text{CDCl}_3$ )  $\delta$  144.7, 141.4, 135.8, 129.2, 128.5, 127.8, 127.7, 126.2, 61.1, 46.9, 38.2, 21.0. The spectrum was consistent with the reported data in reference 3.

### Compound 5

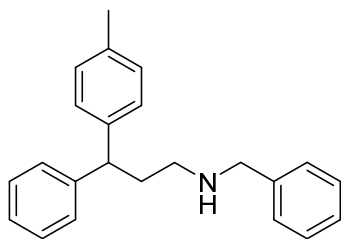

To a solution of aryl cyclopropane **1a** (23.6 mg, 0.20 mmol) and toluene (0.21 ml, 2.0 mmol) in CH<sub>2</sub>Cl<sub>2</sub> (0.2 ml, 1 M) was added BCl<sub>3</sub> (1 M in CH<sub>2</sub>Cl<sub>2</sub> solution, 1.0 ml, 1.0 mmol) at -30 °C. After the mixture was stirred at -30 °C for 48 h, the volatile was removed in vacuo. To the residue, benzyl azide (53.4 mg, 0.40 mmol, 2.0 eq.) in CH<sub>2</sub>Cl<sub>2</sub> (1.5 ml) was added dropwise slowly at room temperature and the mixture was stirred for 2 h. After the completion of the reaction, 10% NaOH aq. was added to the resulting mixture and the resulting mixture was extracted with CH<sub>2</sub>Cl<sub>2</sub>. The organic layer was dried over Na<sub>2</sub>SO<sub>4</sub>, and concentrated in vacuo. The residue was purified by SiO<sub>2</sub> column chromatography (Hexane/AcOEt= 4/1 with 5% Et<sub>3</sub>N to AcOEt with 5% Et<sub>3</sub>N) to give **5** as a pale yellow oil (40.3 mg, 64%, >20:1).

<sup>1</sup>H-NMR (500 MHz, C<sub>6</sub>D<sub>6</sub>) δ 7.29-6.94 (m, 14H), 4.02 (t, *J* = 7.5 Hz, 1H), 3.51 (s, 2H), 2.46 (t, *J* = 6.8 Hz, 2H), 2.14-2.07 (m, 5H); <sup>13</sup>C-NMR (100 MHz, C<sub>6</sub>D<sub>6</sub>) δ 145.8, 142.5, 141.3, 135.6, 129.4, 128.7, 128.6, 128.5, 128.4, 128.3, 127.0, 126.3, 54.1, 48.7, 47.8, 36.4, 21.0; HRMS (MALDI-TOF) calcd for C<sub>23</sub>H<sub>26</sub>N [M+H]<sup>+</sup>: 316.2060, found 316.2063.

### 5. References

- 1) For **1b**, **1e**, **1f**, **1g**: M. H. Gieuw, Z. Ke, and Y. Y. Yeung, *Angew. Chem. Int. Ed.* 2018, **57**, 3782–3786.; For **1c**: D. Wang, X. Xue, K. N. Houk, and Z. Shi, *Angew. Chemie Int. Ed.* 2018, **57**, 16861–16865.
- 2) T. W. Butcher, E. J. McClain, T. G. Hamilton, T. M. Perrone, K. M. Kroner, G. C. Donohoe, N. G. Akhmedov, L. Petersen, and B. V Popp, *Org. Lett.* 2016, **18**, 6428–6431.
- 3) W. J. Jang, S. M. Song, Y. Park, and J. Yun, *J. Org. Chem.* 2019, **84**, 4429–4434.

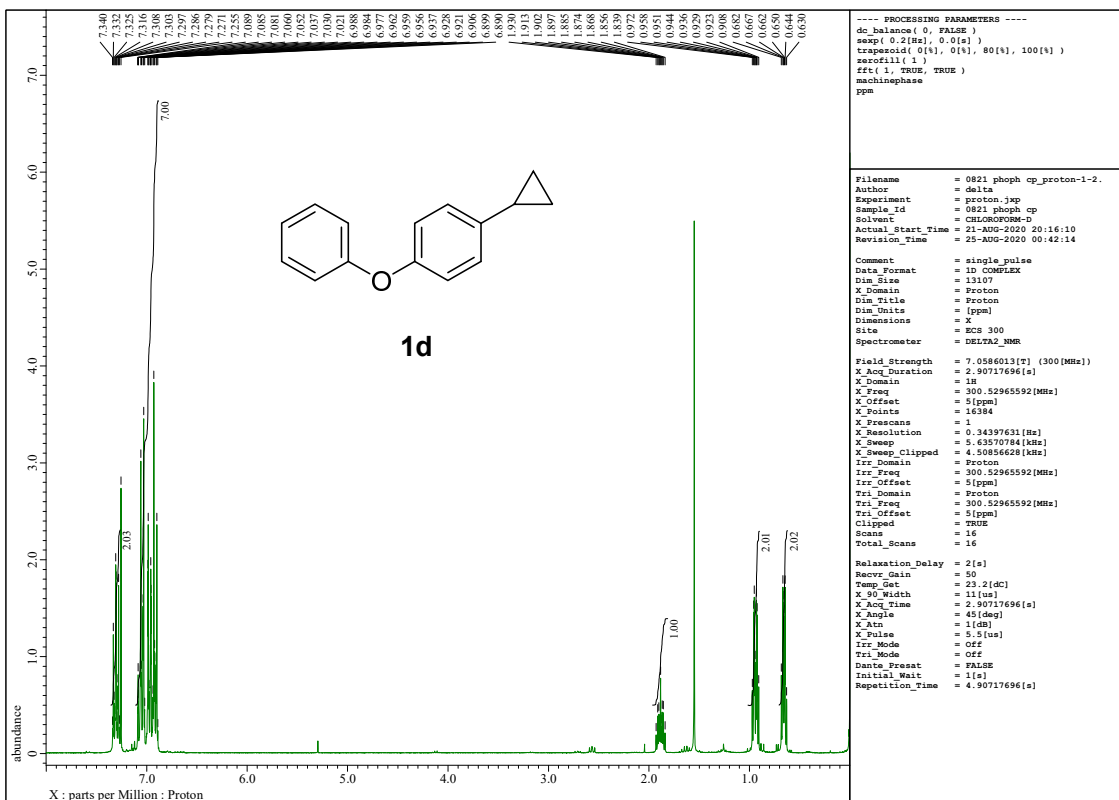

```

---- PROCESSING PARAMETERS ----
dc balance( 0, FALSE )
exp( 2.0[Hz], 0.0[1] )
trapezoid( 0[1], 0[1], 80[1], 100[1] )
zerofill( 1 )
fft( 1, TRUE, TRUE )
machinephase
ppm

Filename = 0821 phoph cp_proton-1-2.
Author = delta
Experiment = proton_jxp
Sample_Id = 0821 phoph cp
Solvent = CHLOROFORM-D
Actual_Start_Time = 21-AUG-2020 20:16:10
Revision_Time = 25-AUG-2020 00:42:14

Comment = single pulse
Data_Format = 1D COMPLEX
Dim_Size = 13107
X_Domain = Proton
Dim_Title = Proton
Dim_Units = [ppm]
Dimensions = X
Site = UCS 300
Spectrometer = DELTA2_NMR

Field_Strength = 7.0586013[T] (300[MHz])
X_Acq_Duration = 2.90717696[s]
X_Domain = 1H
X_Freq = 300.52965592[MHz]
X_Offset = 5[ppm]
X_Points = 16384
X_Prescans = 1
X_Resolution = 0.34397631[Hz]
X_Sweep = 5.63570784[kHz]
X_Sweep_Clipped = 4.50956628[kHz]
Irr_Domain = Proton
Irr_Freq = 300.52965592[MHz]
Irr_Offset = 5[ppm]
Tri_Domain = Proton
Tri_Freq = 300.52965592[MHz]
Tri_Offset = 5[ppm]
Clipped = TRUE
Scans = 16
Total_Scans = 16

Relaxation_Delay = 2[s]
Recvr_Gain = 50
Temp_Get = 23.2[1]
X_90_Width = 11[us]
X_Acq_Time = 2.90717696[s]
X_Angle = 135[deg]
X_Atn = 1[dB]
X_Pulse = 1.5[us]
Irr_Mode = Off
Tri_Mode = Off
Delta_Preat = FALSE
Initial_Wait = 1[s]
Repetition_Time = 4.90717696[s]

```

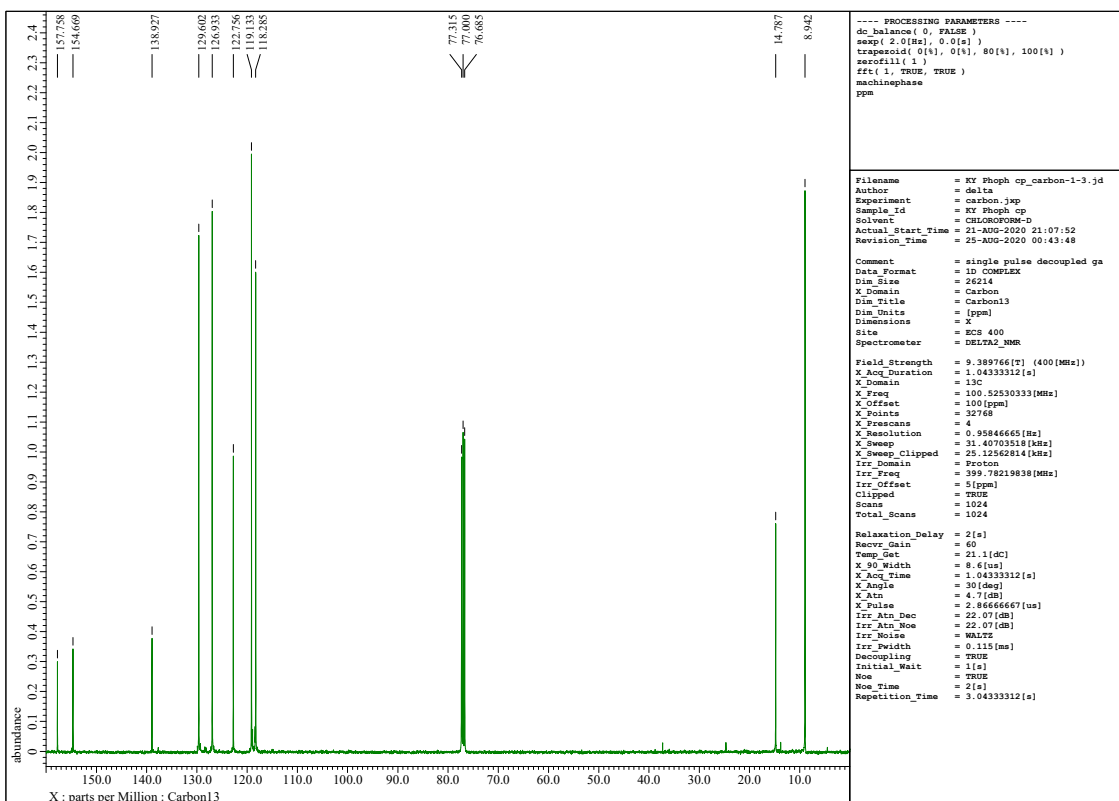

```

---- PROCESSING PARAMETERS ----
dc balance( 0, FALSE )
exp( 2.0[Hz], 0.0[1] )
trapezoid( 0[1], 0[1], 80[1], 100[1] )
zerofill( 1 )
fft( 1, TRUE, TRUE )
machinephase
ppm

Filename = KY Phoph cp_carbon-1-3.jd
Author = delta
Experiment = carbon_jxp
Sample_Id = KY Phoph cp
Solvent = CHLOROFORM-D
Actual_Start_Time = 21-AUG-2020 21:07:52
Revision_Time = 25-AUG-2020 00:43:48

Comment = single pulse decoupled ga
Data_Format = 1D COMPLEX
Dim_Size = 26214
X_Domain = Carbon
Dim_Title = Carbon13
Dim_Units = [ppm]
Dimensions = X
Site = UCS 400
Spectrometer = DELTA2_NMR

Field_Strength = 9.389766[T] (400[MHz])
X_Acq_Duration = 1.04333312[s]
X_Domain = 13C
X_Freq = 100.52530333[MHz]
X_Offset = 100[ppm]
X_Points = 32768
X_Prescans = 4
X_Resolution = 0.9846665[Hz]
X_Sweep = 31.40703518[kHz]
X_Sweep_Clipped = 25.12562814[kHz]
Irr_Domain = Proton
Irr_Freq = 399.78219838[MHz]
Irr_Offset = 5[ppm]
Clipped = TRUE
Scans = 1024
Total_Scans = 1024

Relaxation_Delay = 2[s]
Recvr_Gain = 60
Temp_Get = 21.1[1]
X_90_Width = 8.6[us]
X_Acq_Time = 1.04333312[s]
X_Angle = 90[deg]
X_Atn = 4.7[1]
X_Pulse = 2.8666667[us]
Irr_Atn_Dec = 22.07[1]
Irr_Atn_No2 = 22.07[1]
Irr_Mode = WALTZ
Irr_Pwidth = 0.115[ms]
Decoupling = TRUE
Initial_Wait = 1[s]
Noe = TRUS
Noe_Time = 1[s]
Repetition_Time = 3.04333312[s]

```

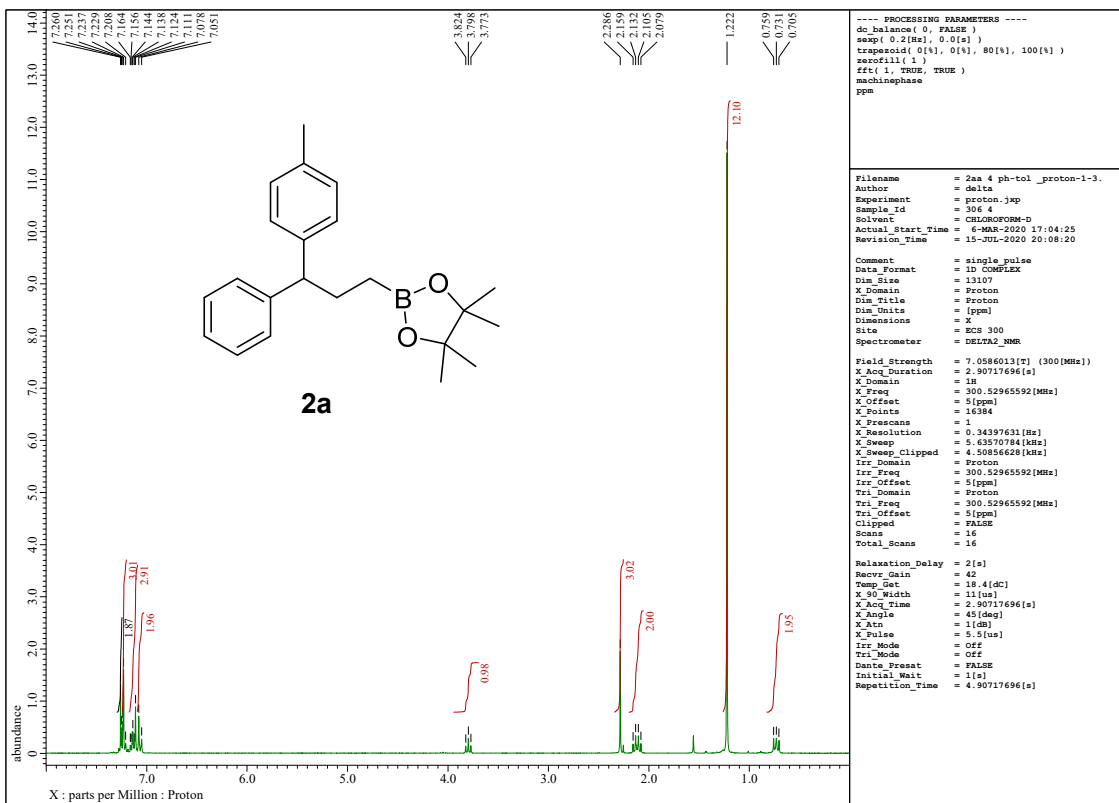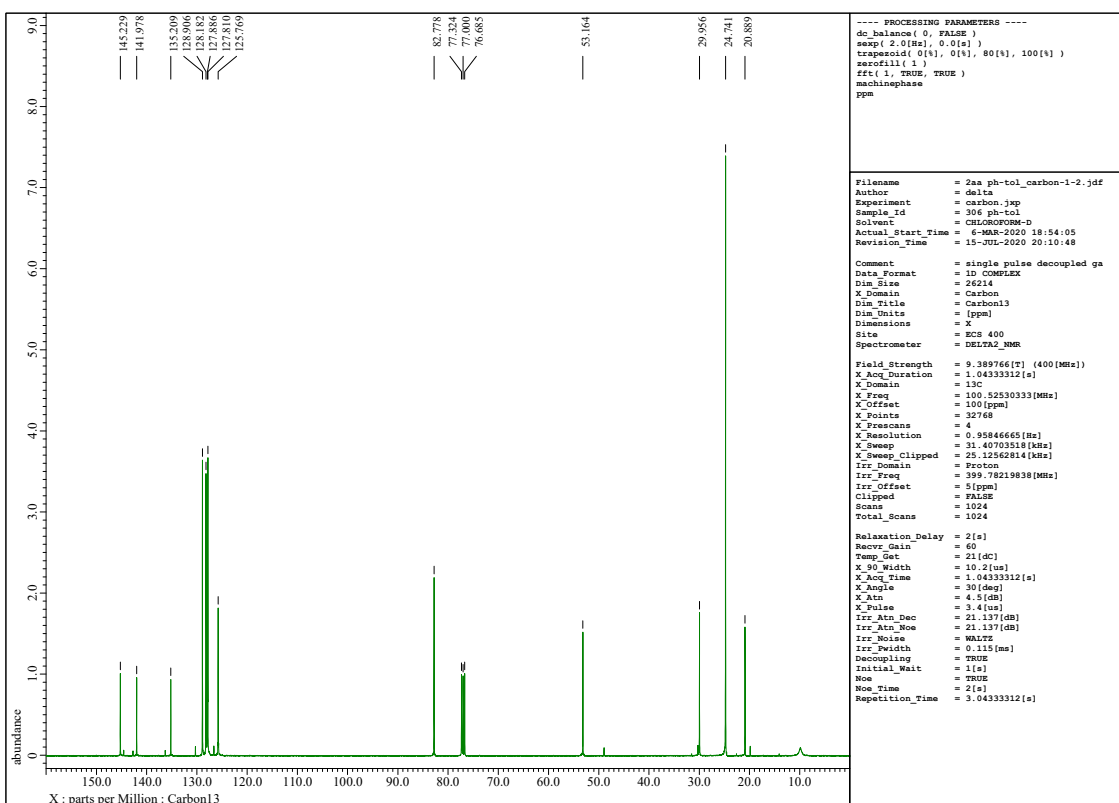

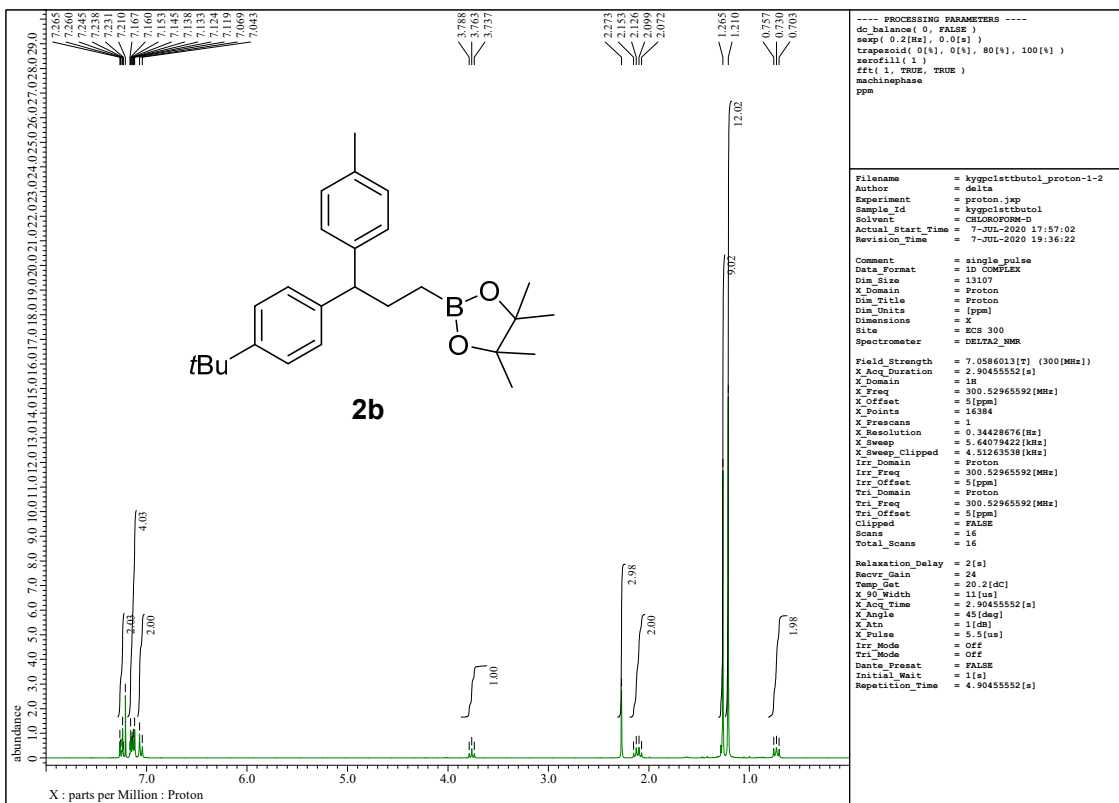

```

---- PROCESSING PARAMETERS ----
dc balance ( 0, FALSE )
exp( 0.2[Hz], 0.0[1] )
trapezoid ( 0[1], 0[1], 80[1], 100[1] )
zerofill( 1 )
fft( 1, TRUE, TRUE )
machinephase
ppm

Filename      = kyggp1stbtol_proton-1-2
Author       = delta
Experiment   = proton_jxp
Sample Id    = kyggp1stbtol
Solvent      = CHLOROFORM-D
Actual_Start Time = 7-JUL-2020 17:57:02
Revision Time = 7-JUL-2020 19:36:22

Comment      = single pulse
Data Format   = ID COMPLEX
Dir Size     = 13107
X_Domain     = Proton
Dir Title    = Proton
Dir Units    = [ppm]
Dimensions   = X
Site         = UCS 300
Spectrometer = DELTA2_NMR

Field Strength = 7.0586013[T] (300[MHz])
X_Acq Duration = 2.9045552[s]
X_Domain       = 1H
X_Freq         = 300.52965592[MHz]
X_Offset       = 5[ppm]
X_Points       = 16384
X_Prescans    = 1
X_Resolution  = 0.34428676[Hz]
X_Sweep       = 5.64079422[kHz]
X_Sweep_Clipped = 4.51263538[kHz]
Irr_Domain    = Proton
Irr_Freq     = 300.52965592[MHz]
Irr_Offset    = 5[ppm]
Tri_Domain   = Proton
Tri_Freq     = 300.52965592[MHz]
Tri_Offset    = 5[ppm]
Clipped      = FALSE
Scans        = 16
Total Scans  = 16

Relaxation_Delay = 2[s]
Recvr Gain       = 24
Temp_Gst        = 20.2[dc]
X_90_Width      = 11[us]
X_Acq Time      = 2.9045552[s]
X_Angle         = 45[deg]
X_Atn           = 1[db]
X_Pulse         = 1.5[us]
Irr_Mode        = Off
Tri_Mode        = Off
Dance_Preset    = FALSE
Initial_Wait    = 1[s]
Repetition_Time = 4.9045552[s]

```

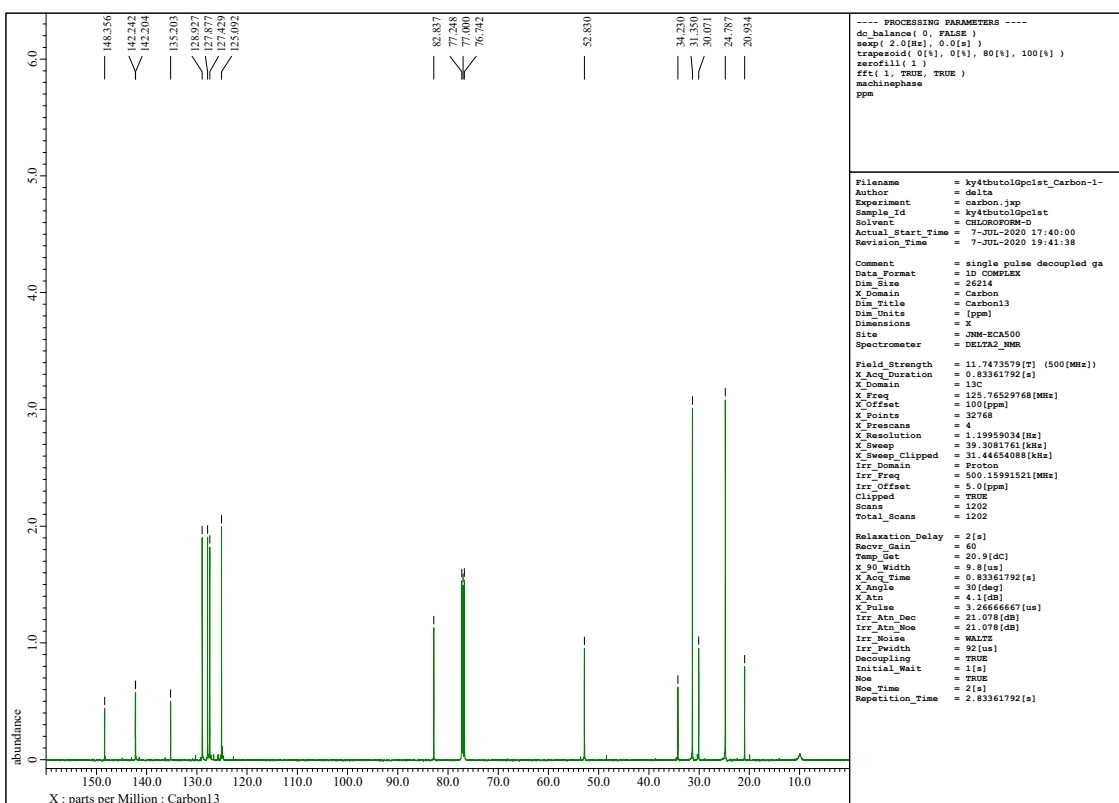

```

---- PROCESSING PARAMETERS ----
dc balance ( 0, FALSE )
exp( 2.0[Hz], 0.0[1] )
trapezoid ( 0[1], 0[1], 80[1], 100[1] )
zerofill( 1 )
fft( 1, TRUE, TRUE )
machinephase
ppm

Filename      = ky4tbuto1pcolst_Carbon-1-
Author       = delta
Experiment   = carbon_jxp
Sample Id    = ky4tbuto1pcolst
Solvent      = CHLOROFORM-D
Actual_Start Time = 7-JUL-2020 17:40:00
Revision Time = 7-JUL-2020 19:41:38

Comment      = single pulse decoupled ga
Data Format   = ID COMPLEX
Dir Size     = 26214
X_Domain     = Carbon
Dir Title    = Carbon13
Dir Units    = [ppm]
Dimensions   = X
Site         = DMN-ECA500
Spectrometer = DELTA2_NMR

Field Strength = 11.747379[T] (500[MHz])
X_Acq Duration = 0.83361792[s]
X_Domain       = 13C
X_Freq         = 125.76529768[MHz]
X_Offset       = 100[ppm]
X_Points       = 32768
X_Prescans    = 4
X_Resolution  = 1.19959034[Hz]
X_Sweep       = 19.3081761[kHz]
X_Sweep_Clipped = 31.44654088[kHz]
Irr_Domain    = Proton
Irr_Freq     = 300.13991521[MHz]
Irr_Offset    = 5.0[ppm]
Clipped      = TRUE
Scans        = 1202
Total Scans  = 1202

Relaxation_Delay = 2[s]
Recvr Gain       = 60
Temp_Gst        = 20.9[dc]
X_90_Width      = 9.8[us]
X_Acq Time      = 0.83361792[s]
X_Angle         = 30[deg]
X_Atn           = 4.1[db]
X_Pulse         = 1.2666667[us]
Irr_Atn_Dec     = 21.078[db]
Irr_Atn_Noise  = 21.078[db]
Irr_Mode        = WALTZ
Irr_Pwidth      = 92[us]
Decoupling      = TRUE
Initial_Wait    = 1[s]
Noe              = TRUE
Noe Time        = 1[s]
Repetition_Time = 2.83361792[s]

```

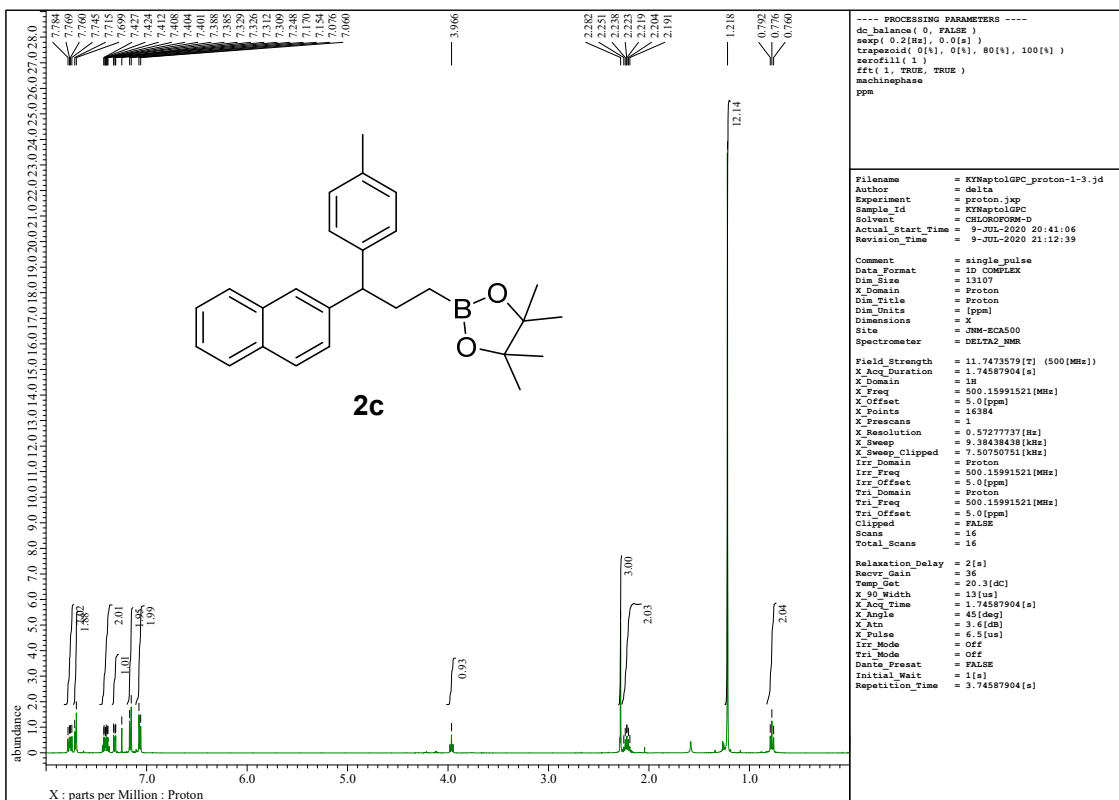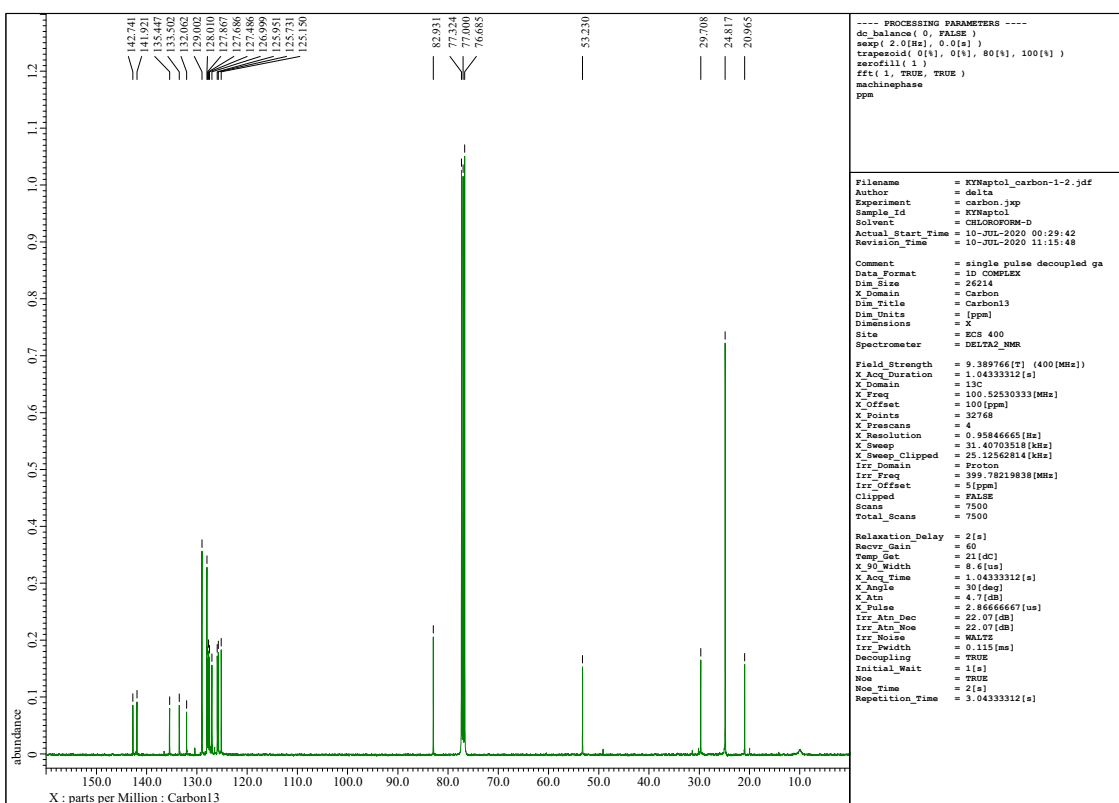

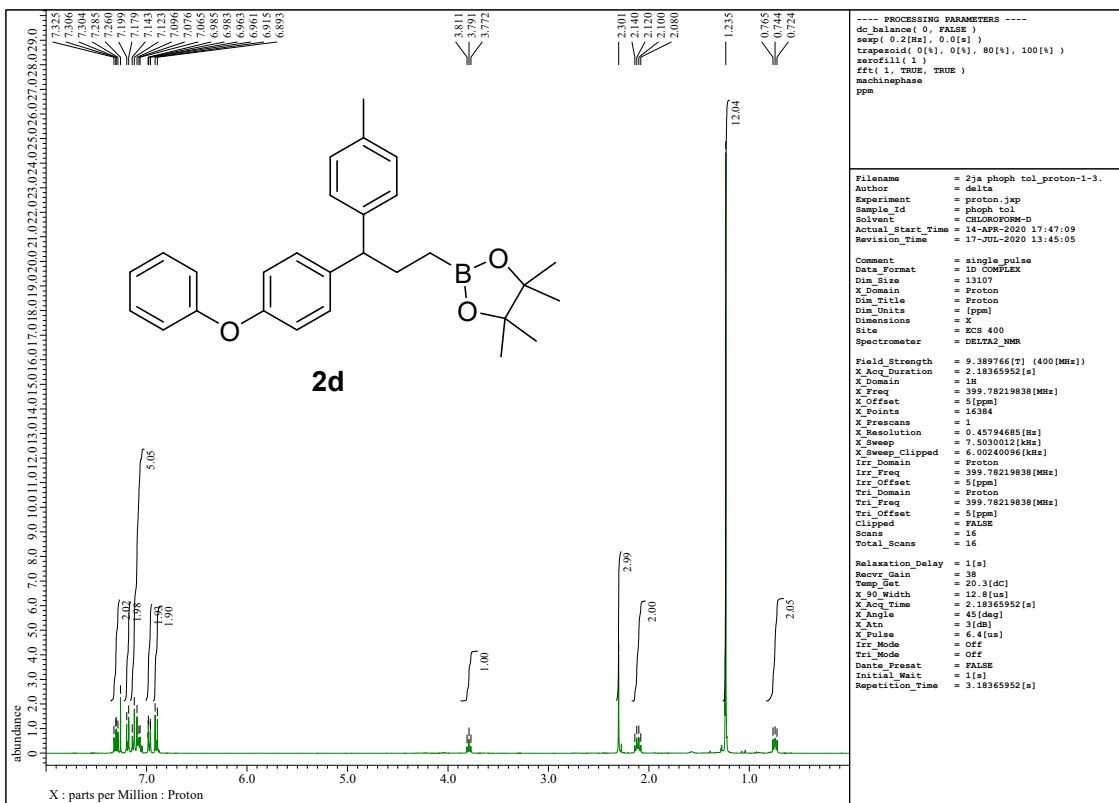

```

---- PROCESSING PARAMETERS ----
dc_balance( 0, FALSE )
exp( 0.2[Hz], 0.0[1] )
trapezoid( 0[1], 0[1], 80[1], 100[1] )
zerofill( 1 )
fft( 1, TRUE, TRUE )
machinephase
ppm

Filename = 2ja_phoph_tol_proton-1-3.
Author = delta
Experiment = proton_jxp
Sample_Id = phoph_tol
Solvent = CHLOROFORM-D
Actual_Start_Time = 14-APR-2020 17:47:09
Revision_Time = 17-JUL-2020 13:45:05

Comment = single pulse
Data_Format = ID COMPLEX
Dim_Size = 13107
X_Domain = Proton
Dim_Title = Proton
Dim_Units = [ppm]
Dimensions = X
Site = UCS 400
Spectrometer = DELTA2_NMR

Field_Strength = 9.389766[T] (400[MHz])
X_Acq_Duration = 2.18365952[s]
X_Domain = 1H
X_Freq = 399.78219838[MHz]
X_Offset = 5[ppm]
X_Points = 16384
X_Prescans = 1
X_Resolution = 0.45794685[Hz]
X_Sweep = 7.5030212[kHz]
X_Sweep_Clipped = 6.00240096[kHz]
Irr_Domain = Proton
Irr_Freq = 399.78219838[MHz]
Irr_Offset = 5[ppm]
Tri_Domain = Proton
Tri_Freq = 399.78219838[MHz]
Tri_Offset = 5[ppm]
Clipped = FALSE
Scans = 16
Total_Scans = 16

Relaxation_Delay = 1[s]
Recvr_Gain = 38
Temp_Set = 30.3[dc]
X_90_Width = 12.8[us]
X_Acq_Time = 2.18365952[s]
X_Angle = 45[deg]
X_Atn = 3[db]
X_Pulse = 1.4[us]
Irr_Mode = Off
Tri_Mode = Off
Dance_Preset = NONE
Initial_Wait = 1[s]
Repetition_Time = 3.18365952[s]

```

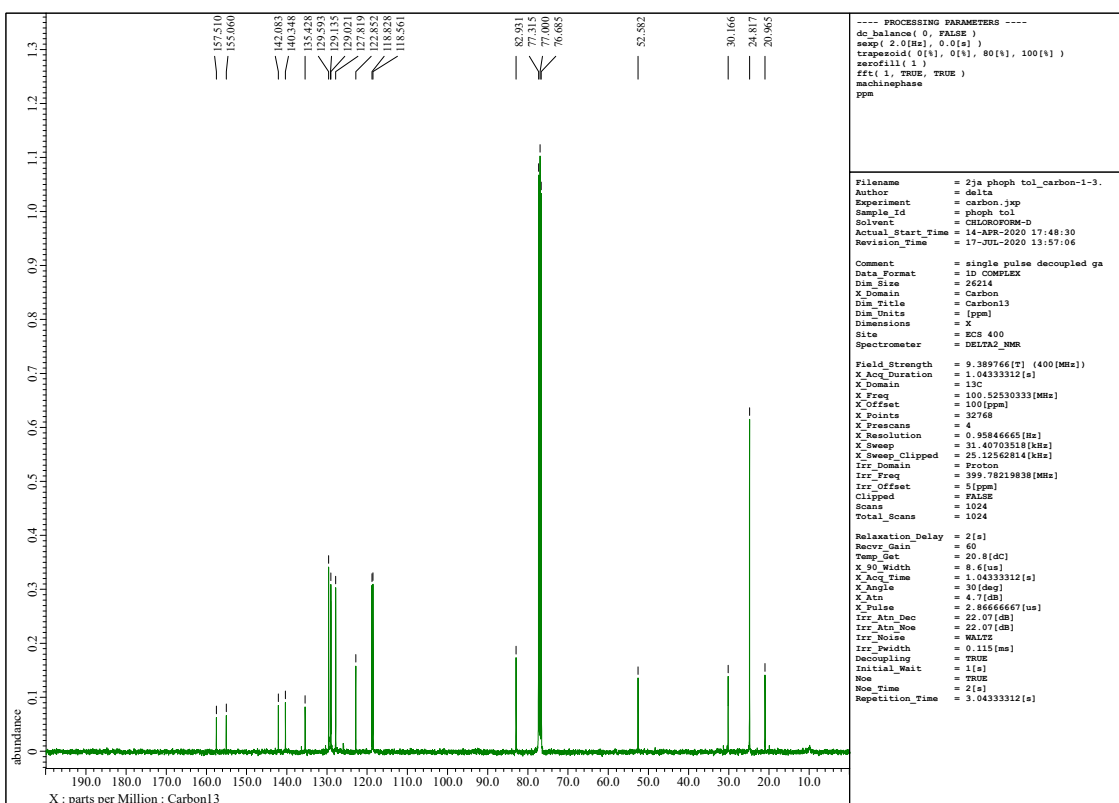

```

---- PROCESSING PARAMETERS ----
dc_balance( 0, FALSE )
exp( 2.0[Hz], 0.0[1] )
trapezoid( 0[1], 0[1], 80[1], 100[1] )
zerofill( 1 )
fft( 1, TRUE, TRUE )
machinephase
ppm

Filename = 2ja_phoph_tol_carbon-1-3.
Author = delta
Experiment = carbon_jxp
Sample_Id = phoph_tol
Solvent = CHLOROFORM-D
Actual_Start_Time = 14-APR-2020 17:48:30
Revision_Time = 17-JUL-2020 13:57:06

Comment = single pulse decoupled ga
Data_Format = ID COMPLEX
Dim_Size = 26214
X_Domain = Carbon
Dim_Title = Carbon13
Dim_Units = [ppm]
Dimensions = X
Site = UCS 400
Spectrometer = DELTA2_NMR

Field_Strength = 9.389766[T] (400[MHz])
X_Acq_Duration = 1.04333312[s]
X_Domain = 13C
X_Freq = 100.52530333[MHz]
X_Offset = 100[ppm]
X_Points = 32768
X_Prescans = 4
X_Resolution = 0.98846665[Hz]
X_Sweep = 31.40703318[kHz]
X_Sweep_Clipped = 25.12562814[kHz]
Irr_Domain = Proton
Irr_Freq = 399.78219838[MHz]
Irr_Offset = 5[ppm]
Clipped = FALSE
Scans = 1024
Total_Scans = 1024

Relaxation_Delay = 2[s]
Recvr_Gain = 60
Temp_Set = 30.3[dc]
X_90_Width = 8.6[us]
X_Acq_Time = 1.04333312[s]
X_Angle = 30[deg]
X_Atn = 4.7[db]
X_Pulse = 2.86666667[us]
Irr_Atn_Dec = 22.07[db]
Irr_Atn_Noise = 22.07[db]
Irr_Mode = WALTZ
Irr_Pwidth = 0.115[ms]
Decoupling = TRUE
Initial_Wait = 1[s]
Noise = TRUE
Noe_Time = 1[s]
Repetition_Time = 3.04333312[s]

```

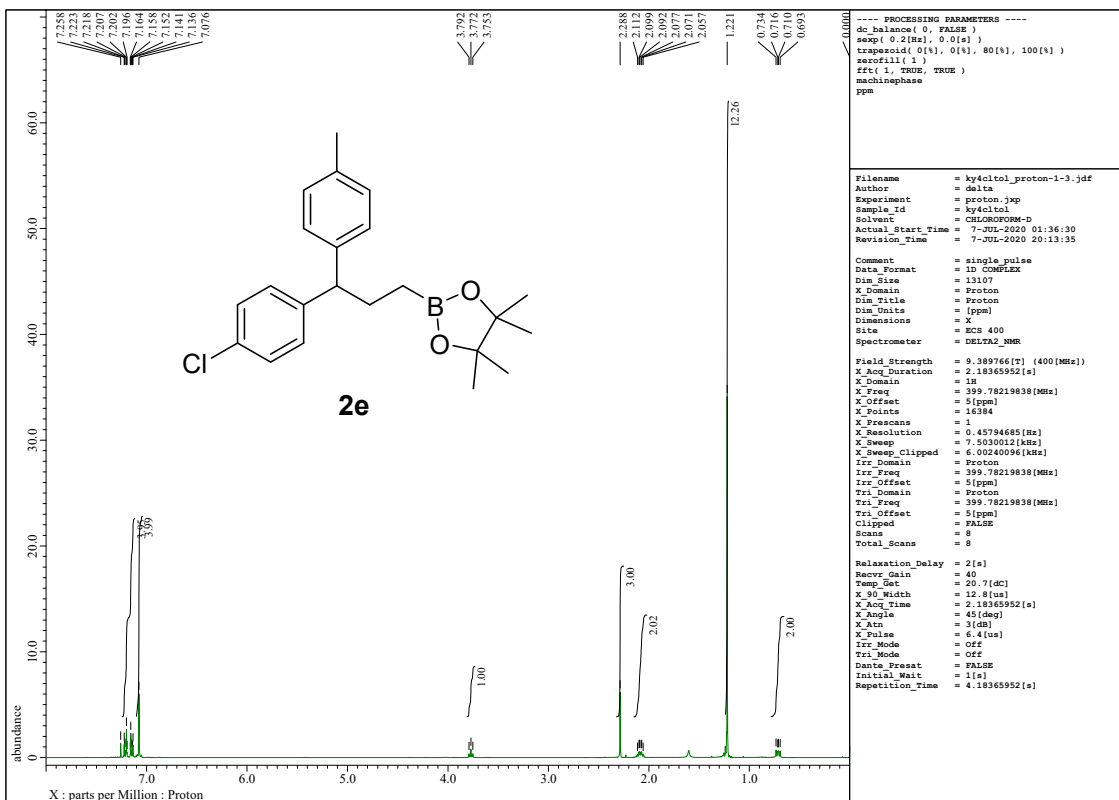

```

---- PROCESSING PARAMETERS ----
dc balance ( 0, FALSE )
sweep ( 0.2[Hz], 0.0[Hz] )
trapezoid ( 0[Hz], 0[Hz], 80[Hz], 100[Hz] )
zerofill ( 1 )
fft ( 1, TRUE, TRUE )
machinephase
ppm

Filename      = ky4cltol_proton-1-3.jdf
Author       = delta
Experiment   = proton.jxp
Sample Id    = ky4cltol
Solvent      = CHLOROFORM-D
Actual_Start Time = 7-JUL-2020 01:36:30
Revision Time = 7-JUL-2020 20:13:35

Comment      = single pulse
Data Format   = 1D COMPLEX
Dim Size     = 13107
X_Domain     = Proton
Dim Title    = Proton
Dim Units    = [ppm]
Dimensions   = X
Site         = HCP 400
Spectrometer = DELTA2_NMR

Field Strength = 9.389766[T] (400[MHz])
X_Acq Duration = 2.18365952[s]
X_Domain       = 1H
X_Freq         = 399.78219838[MHz]
X_Offset       = 5[ppm]
X_Points       = 16384
X_Prescans    = 1
X_Resolution   = 0.45794685[Hz]
X_Sweep        = 7.5030022[kHz]
X_Sweep_Clipped = 6.00240096[kHz]
Irr_Domain     = Proton
Irr_Freq       = 399.78219838[MHz]
Irr_Offset     = 5[ppm]
Tri_Domain     = Proton
Tri_Freq       = 399.78219838[MHz]
Tri_Offset     = 5[ppm]
Clipped        = FALSE
Scans          = 8
Total Scans    = 8

Relaxation_Delay = 2[s]
Recvr Gain       = 40
Temp Set        = 20.7[dc]
X_90_Width      = 12.8[us]
X_Acq Time      = 2.18365952[s]
X_Angle         = 45[deg]
X_Attn          = 3[db]
X_Pulse         = 14[us]
Irr_Mode        = Off
Tri_Mode        = Off
Delta Presat    = FALSE
Initial Wait    = 1[s]
Repetition Time = 4.18365952[s]

```

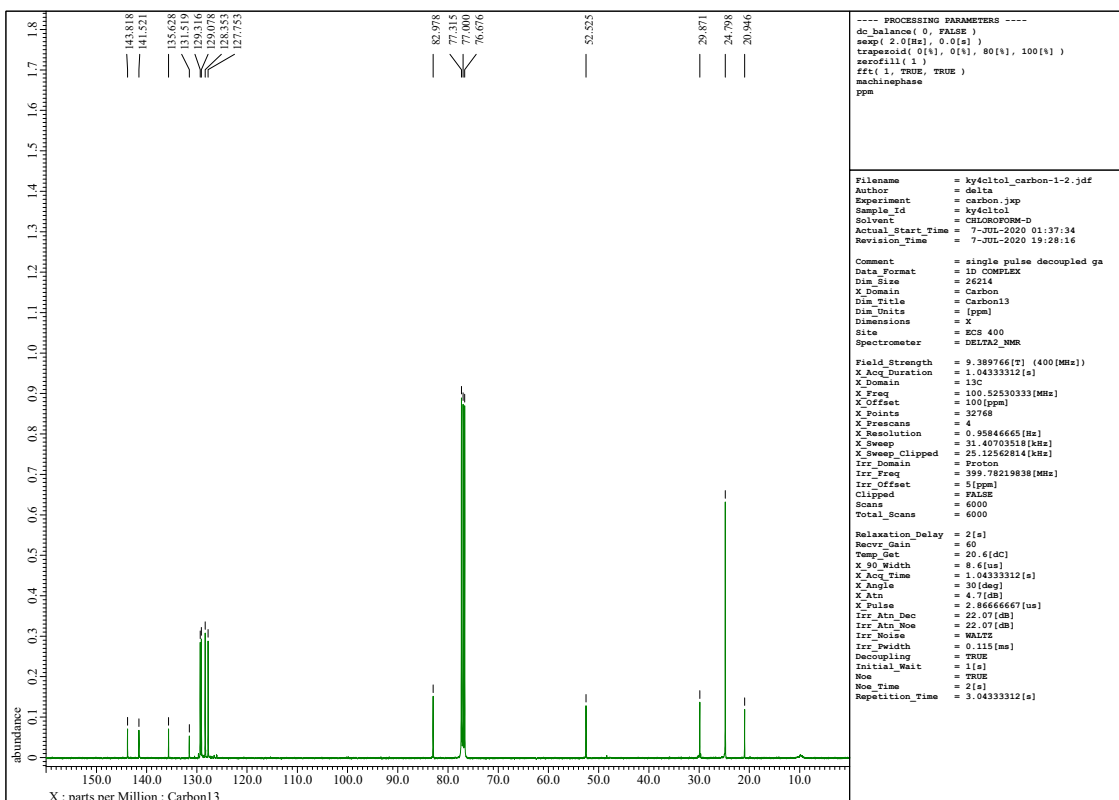

```

---- PROCESSING PARAMETERS ----
dc balance ( 0, FALSE )
sweep ( 2.0[Hz], 0.0[Hz] )
trapezoid ( 0[Hz], 0[Hz], 80[Hz], 100[Hz] )
zerofill ( 1 )
fft ( 1, TRUE, TRUE )
machinephase
ppm

Filename      = ky4cltol_carbon-1-2.jdf
Author       = delta
Experiment   = carbon.jxp
Sample Id    = ky4cltol
Solvent      = CHLOROFORM-D
Actual_Start Time = 7-JUL-2020 01:37:34
Revision Time = 7-JUL-2020 19:28:16

Comment      = single pulse decoupled ga
Data Format   = 1D COMPLEX
Dim Size     = 26214
X_Domain     = Carbon
Dim Title    = Carbon13
Dim Units    = [ppm]
Dimensions   = X
Site         = HCP 400
Spectrometer = DELTA2_NMR

Field Strength = 9.389766[T] (400[MHz])
X_Acq Duration = 1.04333312[s]
X_Domain       = 13C
X_Freq         = 100.52530333[MHz]
X_Offset       = 100[ppm]
X_Points       = 32768
X_Prescans    = 4
X_Resolution   = 0.98846665[Hz]
X_Sweep        = 31.40703518[kHz]
X_Sweep_Clipped = 25.12562814[kHz]
Irr_Domain     = Proton
Irr_Freq       = 399.78219838[MHz]
Irr_Offset     = 5[ppm]
Clipped        = FALSE
Scans          = 6000
Total Scans    = 6000

Relaxation_Delay = 2[s]
Recvr Gain       = 60
Temp Set        = 20.6[dc]
X_90_Width      = 8.6[us]
X_Acq Time      = 1.04333312[s]
X_Angle         = 30[deg]
X_Attn          = 4.7[db]
X_Pulse         = 2.86666667[us]
Irr_Attn_Dec    = 22.07[db]
Irr_Attn_Noise = 22.07[db]
Irr_Noise       = noise
Irr_Pwidth      = 0.115[ms]
Decoupling      = TRUE
Initial Wait    = 1[s]
Noise           = TRUE
Noise Time      = 1[s]
Repetition Time = 3.04333312[s]

```



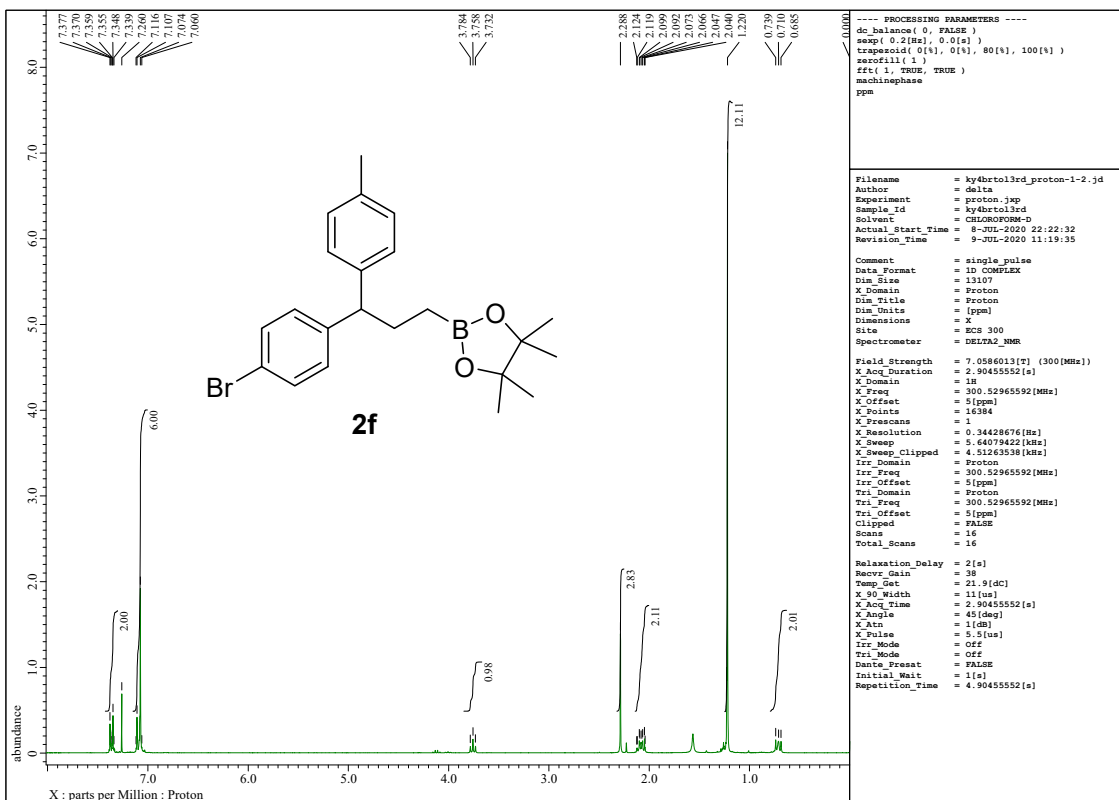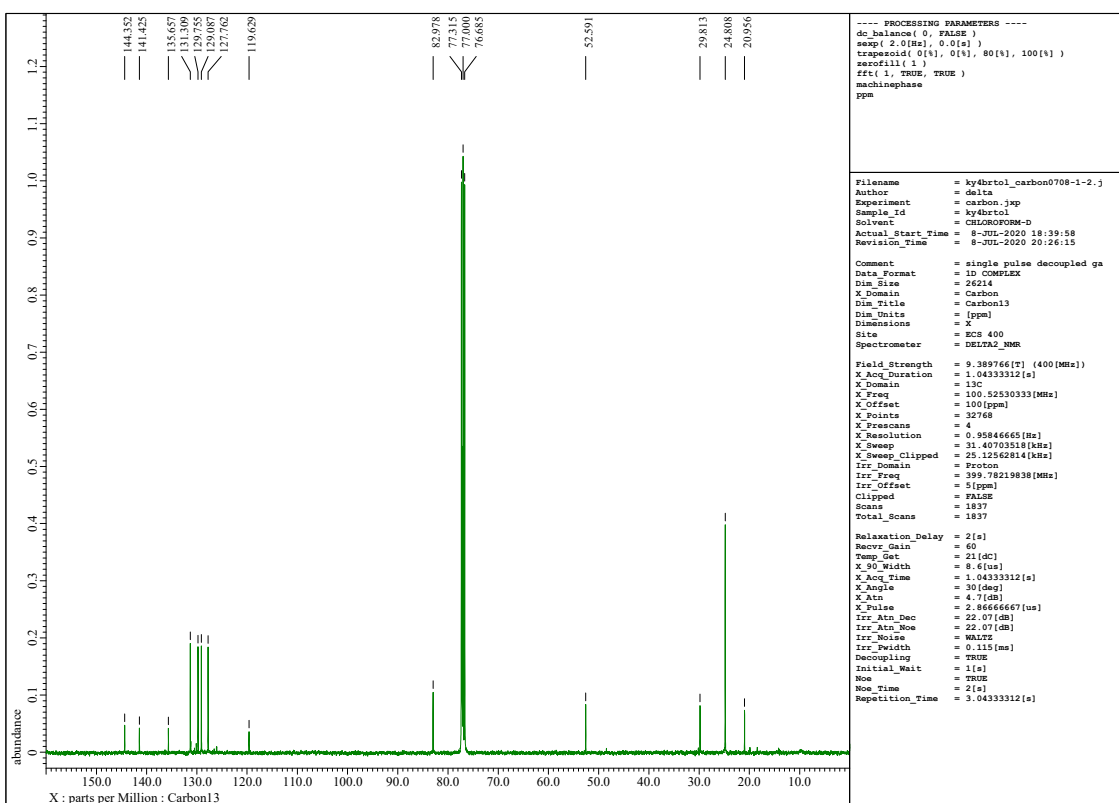



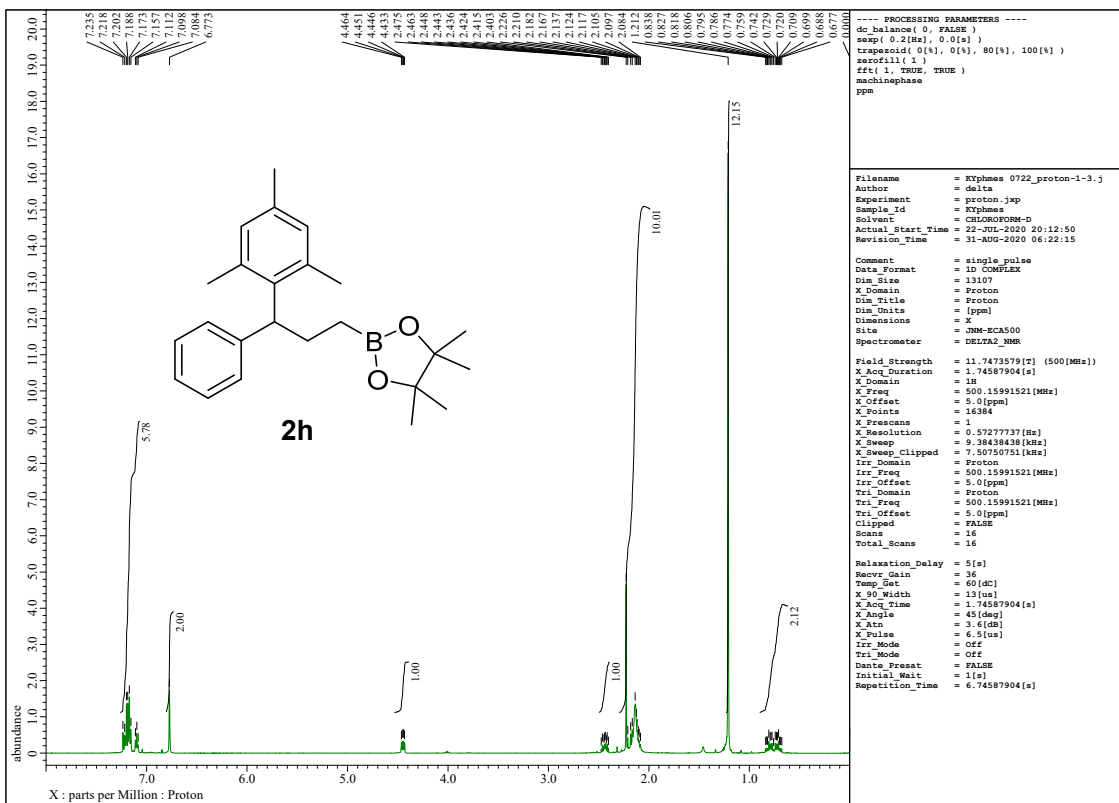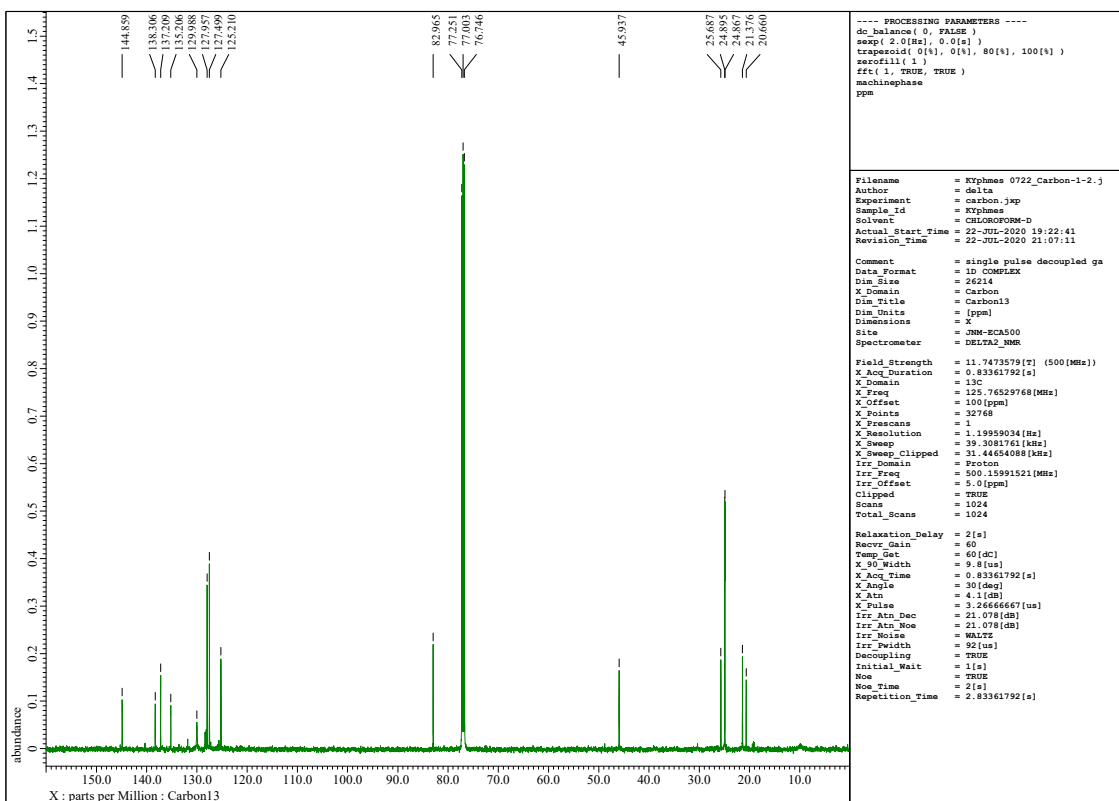

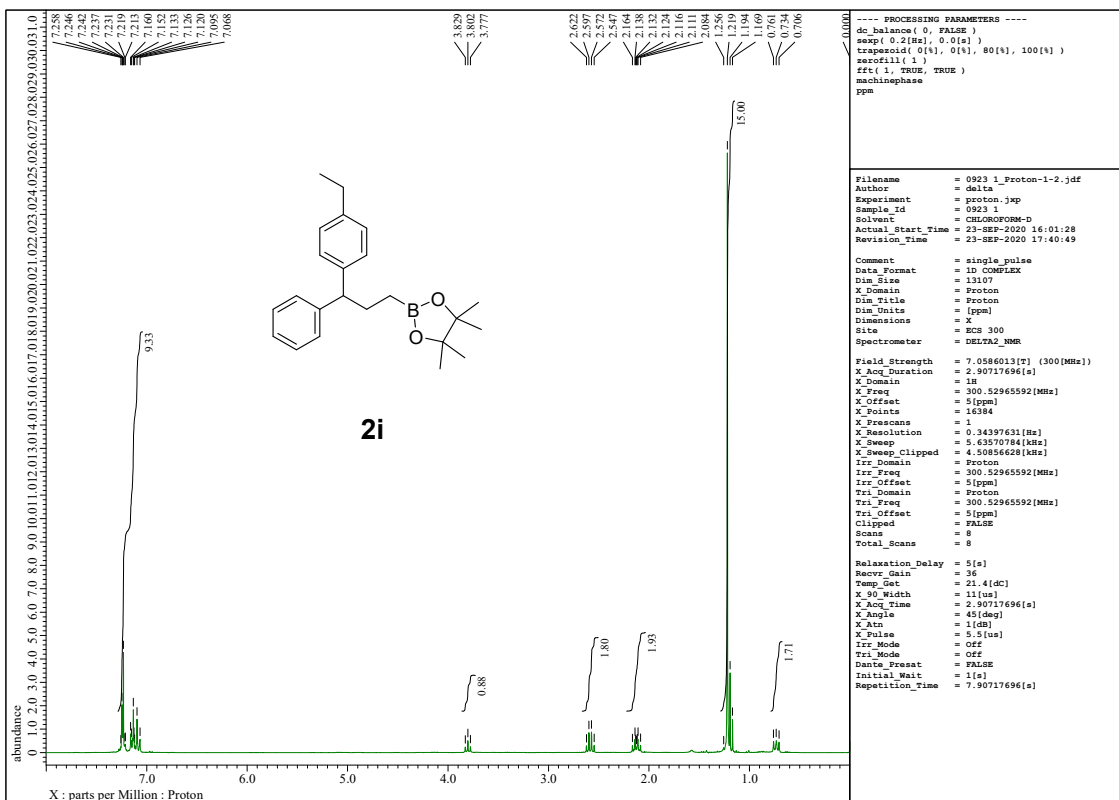

```

---- PROCESSING PARAMETERS ----
dc balance ( 0, FALSE )
smp( 2.0[Hz], 0.0[1] )
trapezoid( 0[1], 0[1], 80[1], 100[1] )
zerofill( 1 )
fft( 1, TRUE, TRUE )
machinephase
ppm

Filename      = 0923_1_Proton-1-2.jdf
Author       = delta
Experiment   = proton.jxp
Sample Id    = 0923_1
Solvent      = CHLOROFORM-D
Actual_Start Time = 23-SEP-2020 16:01:28
Revision_Time = 23-SEP-2020 17:40:49

Comment      = single pulse
Data Format   = 1D COMPLEX
Dim Size     = 13107
X_Domain     = Proton
Dim Title    = Proton
Dim Units    = [ppm]
Dimensions   = X
Site         = UCS 300
Spectrometer = DELTA2_NMR

Field Strength = 7.0586013[T] (300[MHz])
X_Acq_Duration = 2.90717696[s]
X_Domain       = 1H
X_Freq        = 300.52965592[MHz]
X_Offset      = 5[ppm]
X_Points      = 16384
X_Prescans    = 1
X_Resolution  = 0.34397631[Hz]
X_Sweep       = 5.63570784[kHz]
X_Sweep_Clipped = 4.50856628[kHz]
Irr_Domain    = Proton
Irr_Freq     = 300.52965592[MHz]
Irr_Offset   = 5[ppm]
Tri_Domain    = Proton
Tri_Freq     = 300.52965592[MHz]
Tri_Offset   = 5[ppm]
Clipped      = FALSE
Scans        = 8
Total_Scans  = 8

Relaxation_Delay = 5[s]
Recvr_Gain       = 36
Temp_Set        = 21.4[dc]
X_90_Width      = 11[us]
X_Acq_Time      = 2.90717696[s]
X_Angle         = 45[deg]
X_Attn          = 1[db]
X_Pulse         = 5.5[us]
Irr_Mode        = Off
Tri_Mode        = Off
Dantic_Preset   = FALSE
Initial_Wait    = 1[s]
Repetition_Time = 7.90717696[s]

```

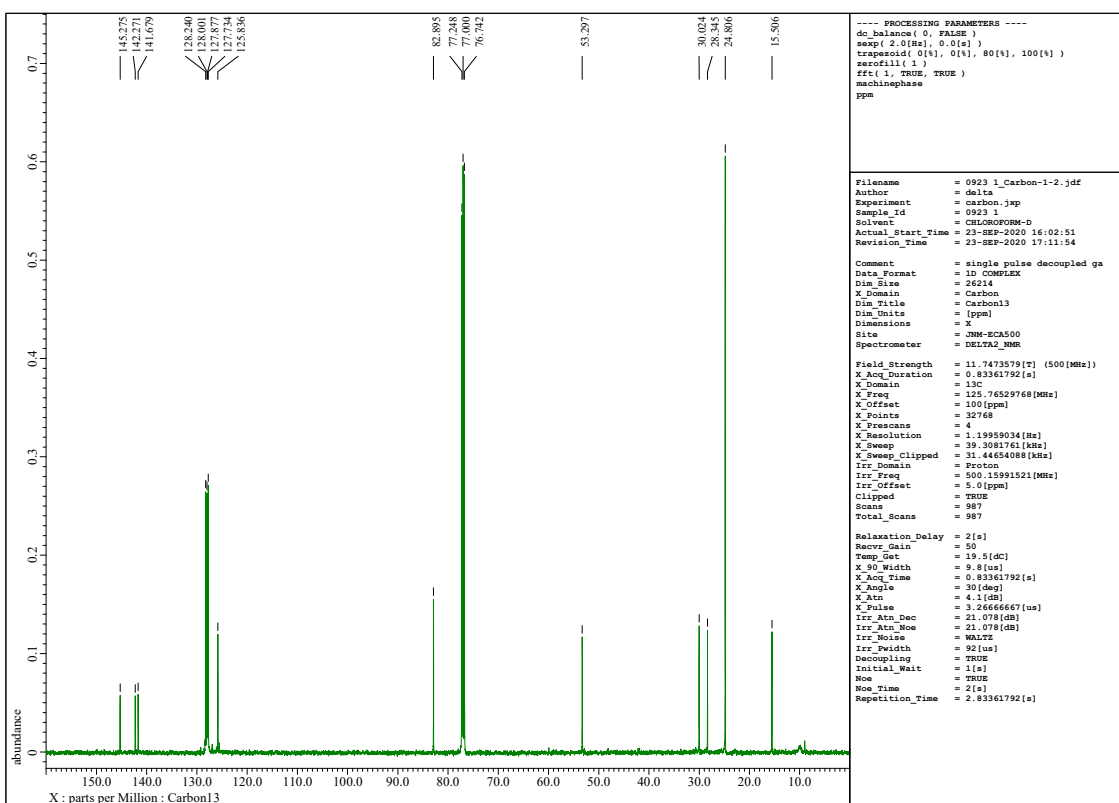

```

---- PROCESSING PARAMETERS ----
dc balance ( 0, FALSE )
smp( 2.0[Hz], 0.0[1] )
trapezoid( 0[1], 0[1], 80[1], 100[1] )
zerofill( 1 )
fft( 1, TRUE, TRUE )
machinephase
ppm

Filename      = 0923_1_Carbon-1-2.jdf
Author       = delta
Experiment   = carbon.jxp
Sample Id    = 0923_1
Solvent      = CHLOROFORM-D
Actual_Start Time = 23-SEP-2020 16:02:51
Revision_Time = 23-SEP-2020 17:11:54

Comment      = single pulse decoupled ga
Data Format   = 1D COMPLEX
Dim Size     = 26214
X_Domain     = Carbon
Dim Title    = Carbon13
Dim Units    = [ppm]
Dimensions   = X
Site         = DMN-ECA500
Spectrometer = DELTA2_NMR

Field Strength = 11.747379[T] (500[MHz])
X_Acq_Duration = 0.83361792[s]
X_Domain       = 13C
X_Freq        = 125.76529768[MHz]
X_Offset      = 100[ppm]
X_Points      = 32768
X_Prescans    = 4
X_Resolution  = 1.19959034[Hz]
X_Sweep       = 19.3081761[kHz]
X_Sweep_Clipped = 31.44654088[kHz]
Irr_Domain    = Proton
Irr_Freq     = 300.15991521[MHz]
Irr_Offset   = 5.0[ppm]
Tri_Domain    = TRUE
Clipped      = TRUE
Scans        = 987
Total_Scans  = 987

Relaxation_Delay = 2[s]
Recvr_Gain       = 50
Temp_Set        = 19.5[dc]
X_90_Width      = 9.8[us]
X_Acq_Time      = 0.83361792[s]
X_Angle         = 30[deg]
X_Attn          = 4.1[db]
X_Pulse         = 1.24666667[us]
Irr_Atn_Dec     = 21.078[db]
Irr_Atn_Noise  = 21.078[db]
Irr_Mode        = WALTZ
Irr_Pwidth      = 92[us]
Decoupling      = TRUE
Initial_Wait    = 1[s]
Noe              = TRUS
Noe_Time        = 1[s]
Repetition_Time = 2.83361792[s]

```

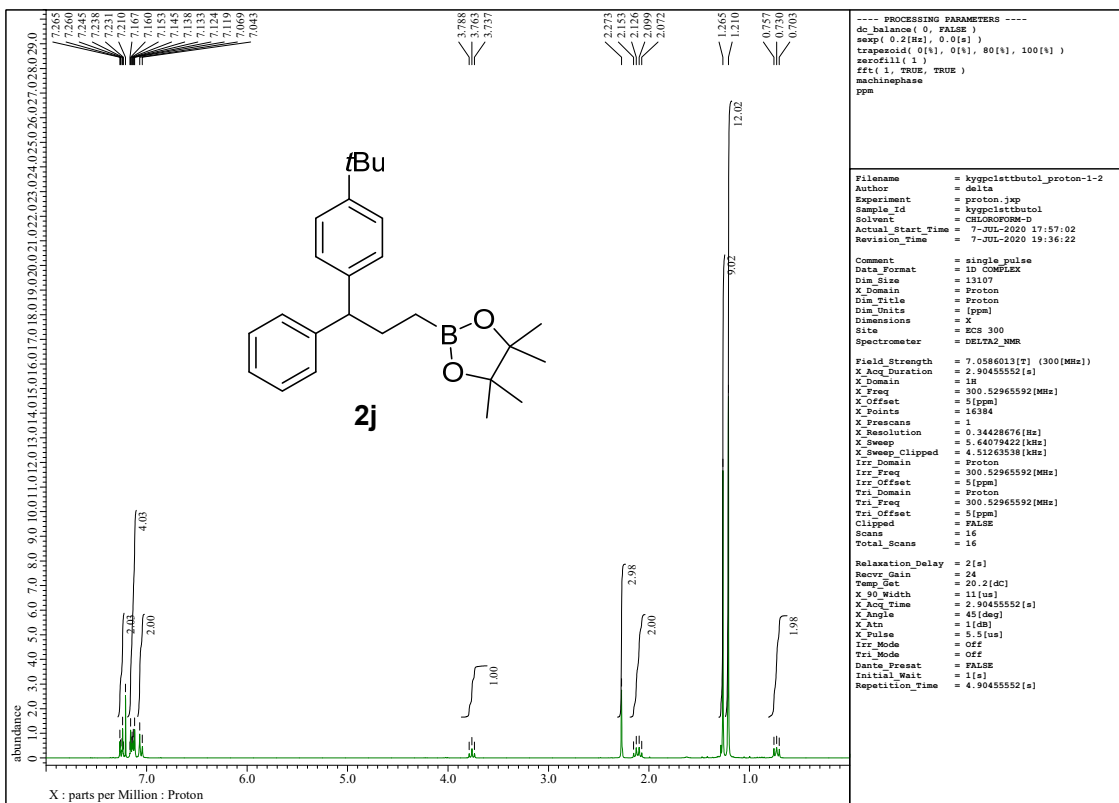

```

---- PROCESSING PARAMETERS ----
dc balance ( 0, FALSE )
exp( 0.218s, 0.01s )
trapezoid ( 0%, 0%, 80%, 100% )
zerofill ( 1 )
fft ( 1, TRUE, TRUE )
machinephase
ppm

Filename = kygpe1stbtol_proton-1-2
Author = delta
Experiment = proton_jxp
Sample_Id = kygpe1stbtol
Solvent = CHLOROFORM-D
Actual_Start_Time = 7-JUL-2020 17:57:02
Revision_Time = 7-JUL-2020 19:36:22

Comment = single pulse
Data_Format = 1D COMPLEX
Dim_Size = 13107
X_Domain = Proton
Dim_Title = Proton
Dim_Units = [ppm]
Dimensions = X
Site = UCS 300
Spectrometer = DELTA2_NMR

Field_Strength = 7.0586013[T] (300[MHz])
X_Acq_Duration = 2.9045552[s]
X_Domain = 1H
X_Freq = 300.52965592[MHz]
X_Offset = 5[ppm]
X_Points = 16384
X_Prescans = 3
X_Resolution = 0.34428676[Hz]
X_Sweep = 5.64079422[kHz]
X_Sweep_Clipped = 4.51263538[kHz]
Irr_Domain = Proton
Irr_Freq = 300.52965592[MHz]
Irr_Offset = 5[ppm]
Tri_Domain = Proton
Tri_Freq = 300.52965592[MHz]
Tri_Offset = 5[ppm]
Clipped = FALSE
Scans = 16
Total_Scans = 16

Relaxation_Delay = 2[s]
Recvr_Gain = 24
Temp_Set = 30.2[dc]
X_90_Width = 11[us]
X_Acq_Time = 2.9045552[s]
X_Angle = 135[deg]
X_Atn = 1[db]
X_Pulse = 11.5[us]
Irr_Mode = Off
Tri_Mode = Off
Delta_Preset = FALSE
Initial_Wait = 1[s]
Repetition_Time = 4.9045552[s]

```

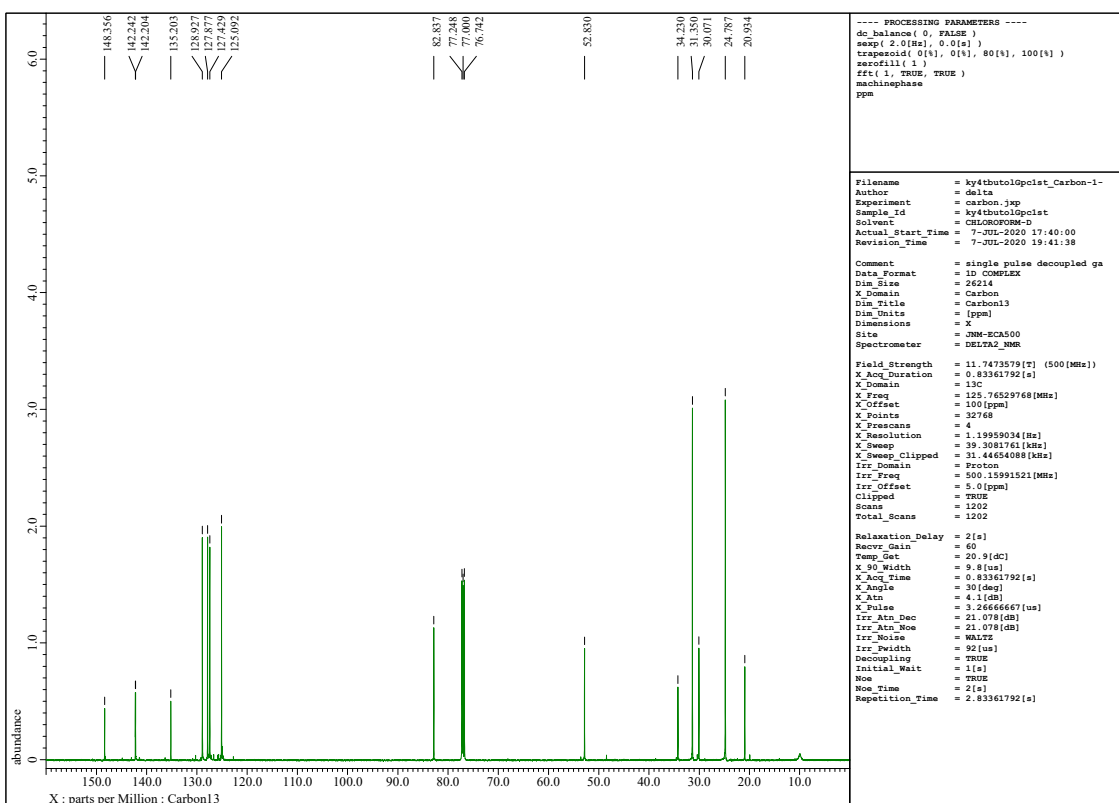

```

---- PROCESSING PARAMETERS ----
dc balance ( 0, FALSE )
exp( 2.018s, 0.01s )
trapezoid ( 0%, 0%, 80%, 100% )
zerofill ( 1 )
fft ( 1, TRUE, TRUE )
machinephase
ppm

Filename = ky4tbtol0pelst_Carbon-1-
Author = delta
Experiment = carbon_jxp
Sample_Id = ky4tbtol0pelst
Solvent = CHLOROFORM-D
Actual_Start_Time = 7-JUL-2020 17:40:00
Revision_Time = 7-JUL-2020 19:41:38

Comment = single pulse decoupled ga
Data_Format = 1D COMPLEX
Dim_Size = 26214
X_Domain = Carbon
Dim_Title = Carbon13
Dim_Units = [ppm]
Dimensions = X
Site = DMS-ECA500
Spectrometer = DELTA2_NMR

Field_Strength = 11.747379[T] (500[MHz])
X_Acq_Duration = 0.83361792[s]
X_Domain = 13C
X_Freq = 125.76529768[MHz]
X_Offset = 100[ppm]
X_Points = 32768
X_Prescans = 4
X_Resolution = 1.19959034[Hz]
X_Sweep = 19.3081761[kHz]
X_Sweep_Clipped = 31.44654088[kHz]
Irr_Domain = Proton
Irr_Freq = 300.13991521[MHz]
Irr_Offset = 5.0[ppm]
Irr_Mode = gPRR
Clipped = FALSE
Scans = 1202
Total_Scans = 1202

Relaxation_Delay = 2[s]
Recvr_Gain = 60
Temp_Set = 30.9[dc]
X_90_Width = 9.8[us]
X_Acq_Time = 0.83361792[s]
X_Angle = 30[deg]
X_Atn = 4.1[db]
X_Pulse = 1.24666667[us]
Irr_Atn_Dec = 21.078[db]
Irr_Atn_NoE = 21.078[db]
Irr_Mode = gPRR
Irr_Pwidth = 92[us]
Decoupling = TRUE
Initial_Wait = 1[s]
NoE = TRUE
NoE_Time = 1[s]
Repetition_Time = 2.83361792[s]

```

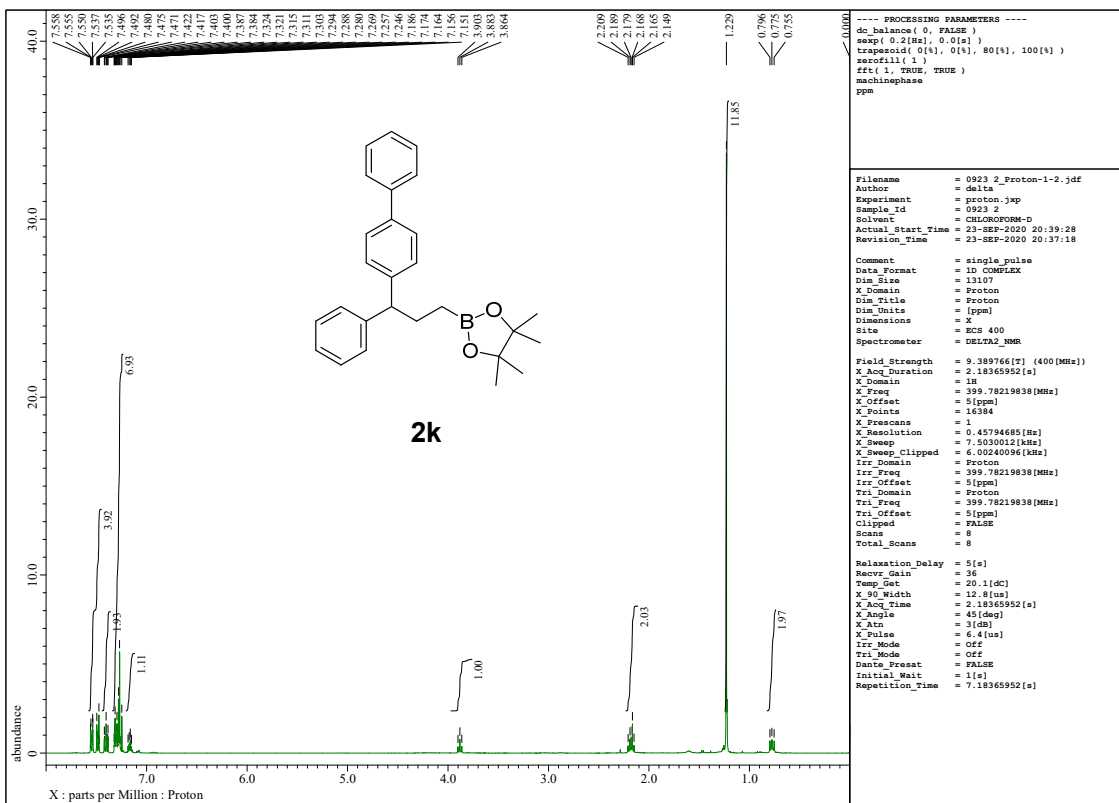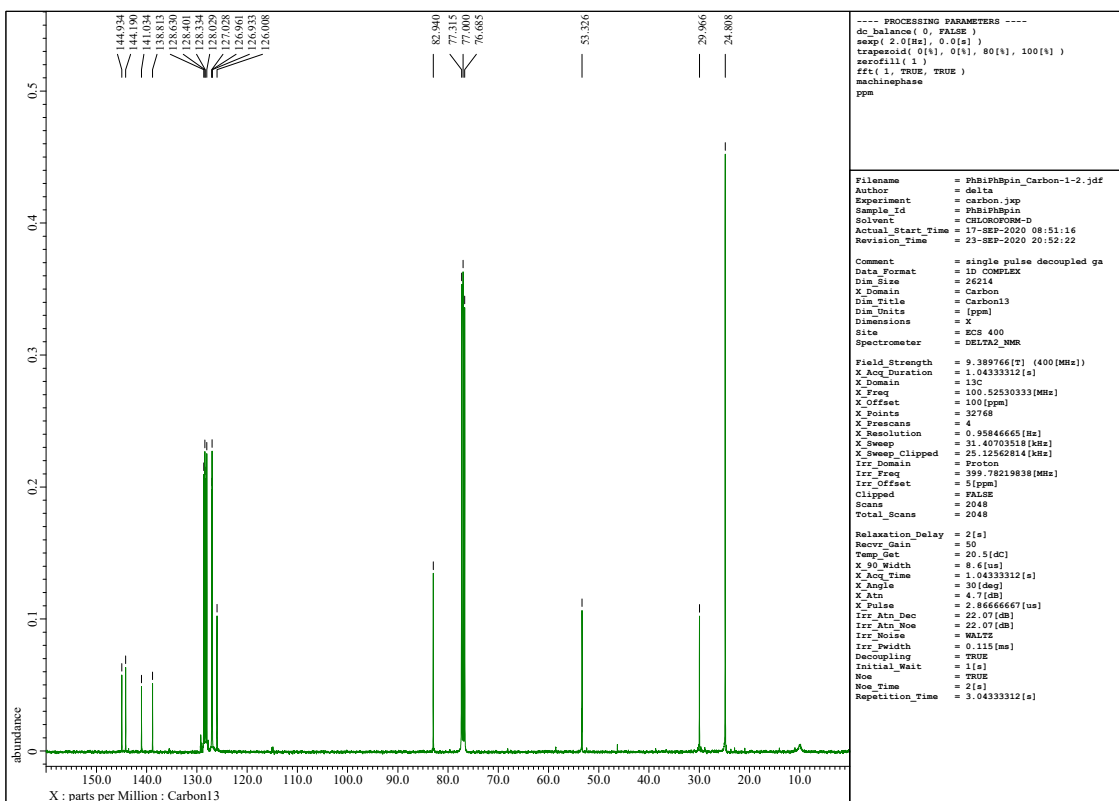

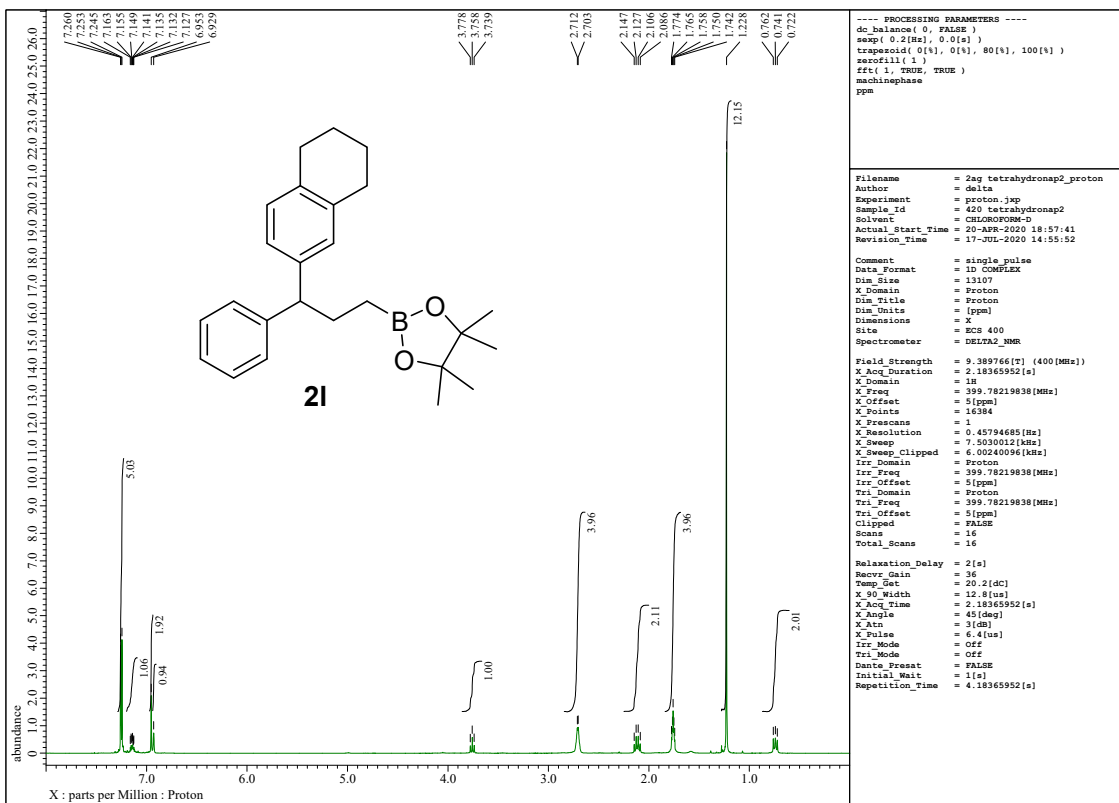

```

---- PROCESSING PARAMETERS ----
dc balance ( 0, FALSE )
exp( 2.0[Hz], 0.0[1] )
trapezoid( 0[1], 0[1], 80[1], 100[1] )
zerofill( 1 )
fft( 1, TRUE, TRUE )
machinephase
ppm

Filename = 2ag tetrahydronap2_proton
Author = delta
Experiment = proton_jxp
Sample_Id = 420 tetrahydronap2
Solvent = CHLOROFORM-D
Actual_Start_Time = 20-APR-2020 18:57:41
Revision_Time = 17-JUL-2020 14:55:52

Comment = single pulse
Data_Format = ID COMPLEX
Dim_Size = 13107
X_Domain = Proton
Dim_Title = Proton
Dim_Units = [ppm]
Dimensions = X
Site = UCS 400
Spectrometer = DELTA2_NMR

Field_Strength = 9.389766[1] (400[MHz])
X_Acq_Duration = 2.18365952[s]
X_Domain = 1H
X_Freq = 399.78219838[MHz]
X_Offset = 5[ppm]
X_Points = 16384
X_Prescans = 1
X_Resolution = 0.45794685[Hz]
X_Sweep = 7.5030022[kHz]
X_Sweep_Clipped = 6.00240096[kHz]
Irr_Domain = Proton
Irr_Freq = 399.78219838[MHz]
Irr_Offset = 5[ppm]
Irr_Domain = Proton
Tri_Freq = 399.78219838[MHz]
Tri_Offset = 5[ppm]
Clipped = FALSE
Scans = 16
Total_Scans = 16

Relaxation_Delay = 2[s]
Recvr_Gain = 36
Temp_Get = 20.2[dc]
X_90_Width = 12.8[us]
X_Acq_Time = 2.18365952[s]
X_Angle = 45[deg]
X_Atn = 3[db]
X_Pulse = 1.4[us]
Irr_Mode = Off
Tri_Mode = Off
Delta_Preset = FALSE
Initial_Wait = 1[s]
Repetition_Time = 4.18365952[s]

```

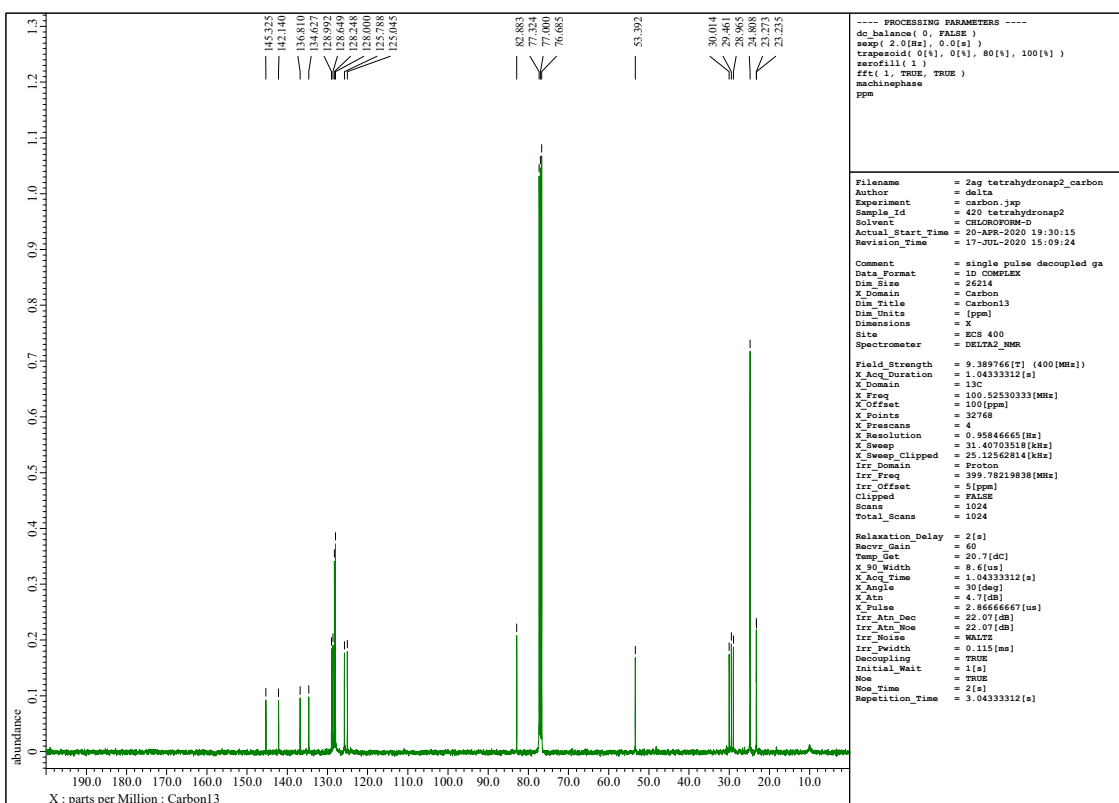

```

---- PROCESSING PARAMETERS ----
dc balance ( 0, FALSE )
exp( 2.0[Hz], 0.0[1] )
trapezoid( 0[1], 0[1], 80[1], 100[1] )
zerofill( 1 )
fft( 1, TRUE, TRUE )
machinephase
ppm

Filename = 2ag tetrahydronap2_carbon
Author = delta
Experiment = carbon_jxp
Sample_Id = 420 tetrahydronap2
Solvent = CHLOROFORM-D
Actual_Start_Time = 20-APR-2020 19:30:15
Revision_Time = 17-JUL-2020 15:09:24

Comment = single pulse decoupled ga
Data_Format = ID COMPLEX
Dim_Size = 26214
X_Domain = Carbon13
Dim_Title = Carbon13
Dim_Units = [ppm]
Dimensions = X
Site = UCS 400
Spectrometer = DELTA2_NMR

Field_Strength = 9.389766[T] (400[MHz])
X_Acq_Duration = 1.04333312[s]
X_Domain = 13C
X_Freq = 100.52530333[MHz]
X_Offset = 100[ppm]
X_Points = 32768
X_Prescans = 4
X_Resolution = 0.98846665[Hz]
X_Sweep = 31.40703318[kHz]
X_Sweep_Clipped = 25.12562814[kHz]
Irr_Domain = Proton
Irr_Freq = 399.78219838[MHz]
Irr_Offset = 5[ppm]
Clipped = FALSE
Scans = 1024
Total_Scans = 1024

Relaxation_Delay = 2[s]
Recvr_Gain = 60
Temp_Get = 20.7[dc]
X_90_Width = 8.6[us]
X_Acq_Time = 1.04333312[s]
X_Angle = 30[deg]
X_Atn = 4.7[db]
X_Pulse = 2.8666667[us]
Irr_Atn_Dec = 22.07[db]
Irr_Atn_Noise = 22.07[db]
Irr_Noise = 0.115[ms]
Irr_Pwidth = 0.115[ms]
Decoupling = TRUE
Initial_Wait = 1[s]
Noe = TRUE
Noe_Time = 1[s]
Repetition_Time = 3.04333312[s]

```

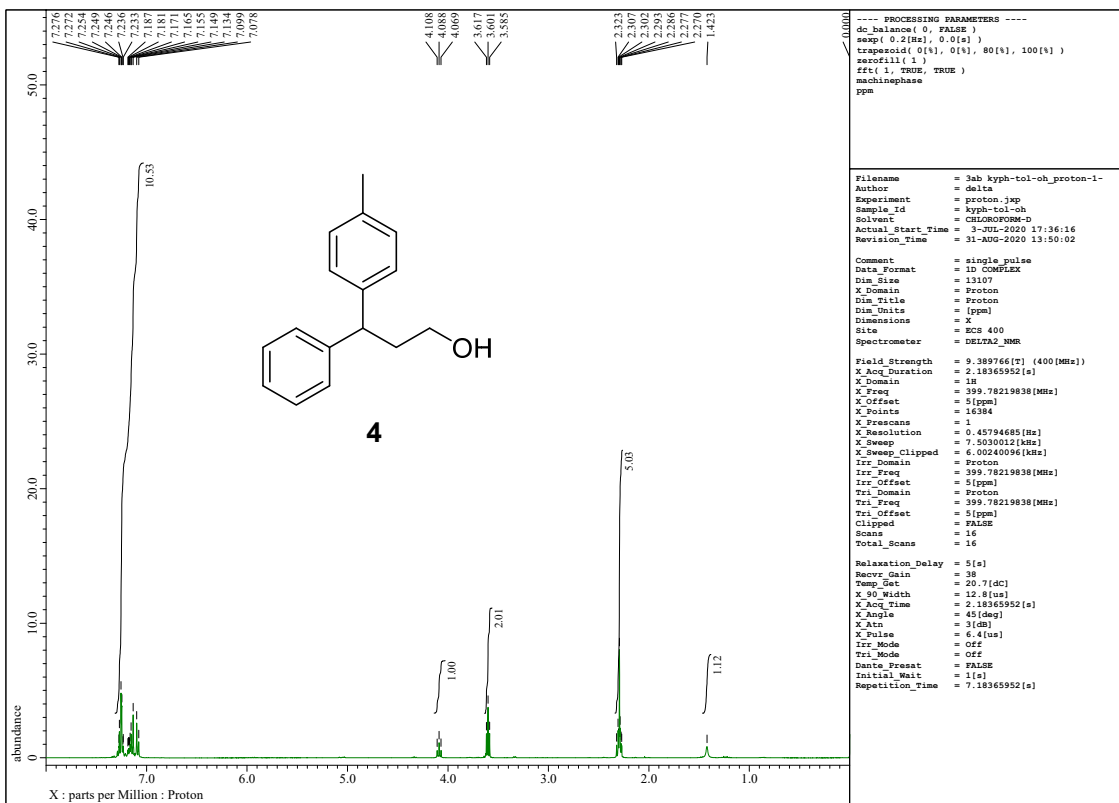

```

---- PROCESSING PARAMETERS ----
dc balance( 0, FALSE )
exp( 0.2[Hz], 0.0[1] )
trapezoid( 0[1], 0[1], 80[1], 100[1] )
serefill( 1 )
fft( 1, TRUE, TRUE )
machinephase
ppm

Filename = 3ab kyph-tol-oh_proton-1-
Author = delta
Experiment = proton_jxp
Sample_Id = kyph-tol-oh
Solvent = CHLOROFORM-D
Actual_Start_Time = 31-AUG-2020 17:36:16
Revision_Time = 31-AUG-2020 13:50:02

Comment = single pulse
Data_Format = ID COMPLEX
Dim_Size = 13107
X_Domain = Proton
Dim_Title = Proton
Dim_Units = [ppm]
Dimensions = X
Site = UCS 400
Spectrometer = DELTA2_NMR

Field_Strength = 9.389766[1] (400[MHz])
X_Acq_Duration = 2.18365952[s]
X_Domain = 1H
X_Freq = 399.78219838[MHz]
X_Offset = 5[ppm]
X_Points = 16384
X_Prescans = 3
X_Resolution = 0.45794685[Hz]
X_Sweep = 7.50300212[kHz]
X_Sweep_Clipped = 6.00240096[kHz]
Irr_Domain = Proton
Irr_Freq = 399.78219838[MHz]
Irr_Offset = 5[ppm]
Irr_Domain = Proton
Tri_Freq = 399.78219838[MHz]
Tri_Offset = 5[ppm]
Clipped = FALSE
Scans = 16
Total_Scans = 16

Relaxation_Delay = 5[s]
Recvr_Gain = 38
Temp_Set = 20.7[dc]
X_90_Width = 12.8[us]
X_Acq_Time = 2.18365952[s]
X_Angle = 45[deg]
X_Attn = 3[db]
X_Pulse = 16.4[us]
Irr_Mode = Off
Dance_Preset = FALSE
Initial_Wait = 1[s]
Repetition_Time = 7.18365952[s]

```

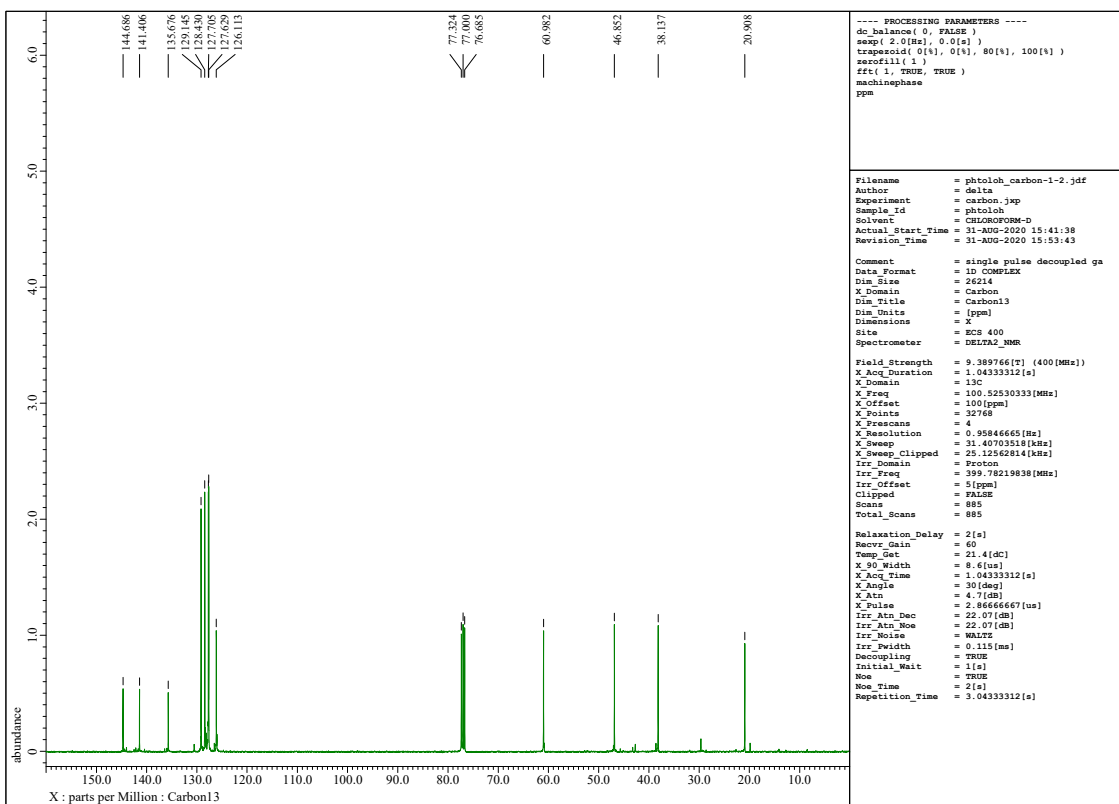

```

---- PROCESSING PARAMETERS ----
dc balance( 0, FALSE )
exp( 2.0[Hz], 0.0[1] )
trapezoid( 0[1], 0[1], 80[1], 100[1] )
serefill( 1 )
fft( 1, TRUE, TRUE )
machinephase
ppm

Filename = phtoloh_carbon-1-2.jdf
Author = delta
Experiment = carbon_jxp
Sample_Id = phtoloh
Solvent = CHLOROFORM-D
Actual_Start_Time = 31-AUG-2020 15:41:38
Revision_Time = 31-AUG-2020 15:53:43

Comment = single pulse decoupled ga
Data_Format = ID COMPLEX
Dim_Size = 26214
X_Domain = Carbon
Dim_Title = Carbon13
Dim_Units = [ppm]
Dimensions = X
Site = UCS 400
Spectrometer = DELTA2_NMR

Field_Strength = 9.389766[1] (400[MHz])
X_Acq_Duration = 1.04333312[s]
X_Domain = 13C
X_Freq = 100.52530333[MHz]
X_Offset = 100[ppm]
X_Points = 32768
X_Prescans = 4
X_Resolution = 0.98846665[Hz]
X_Sweep = 31.40703318[kHz]
X_Sweep_Clipped = 25.12562814[kHz]
Irr_Domain = Proton
Irr_Freq = 399.78219838[MHz]
Irr_Offset = 5[ppm]
Clipped = FALSE
Scans = 885
Total_Scans = 885

Relaxation_Delay = 2[s]
Recvr_Gain = 60
Temp_Set = 21.4[dc]
X_90_Width = 8.6[us]
X_Acq_Time = 1.04333312[s]
X_Angle = 30[deg]
X_Attn = 4.7[db]
X_Pulse = 2.86664667[us]
Irr_Atn_Dec = 22.07[db]
Irr_Atn_Noise = 22.07[db]
Irr_Mode = WALTZ
Irr_Pwidth = 0.115[ms]
Decoupling = TRUE
Initial_Wait = 1[s]
Noe = TRUE
Noe_Time = 1[s]
Repetition_Time = 3.04333312[s]

```



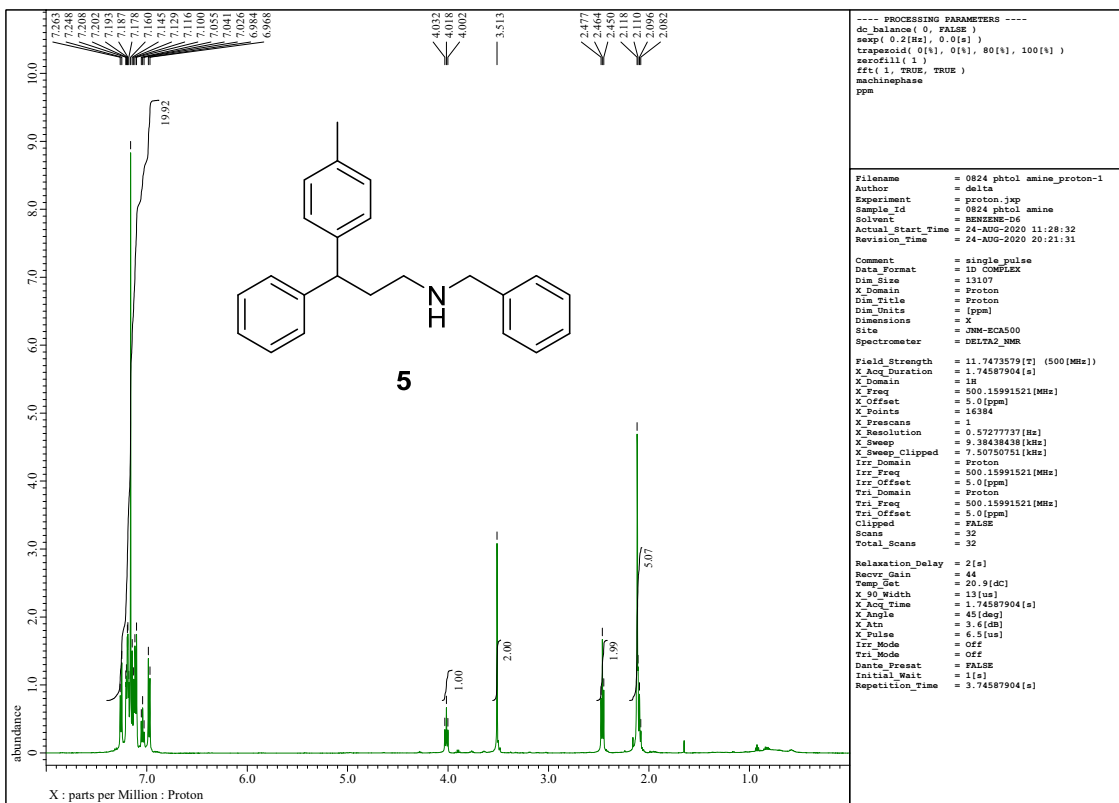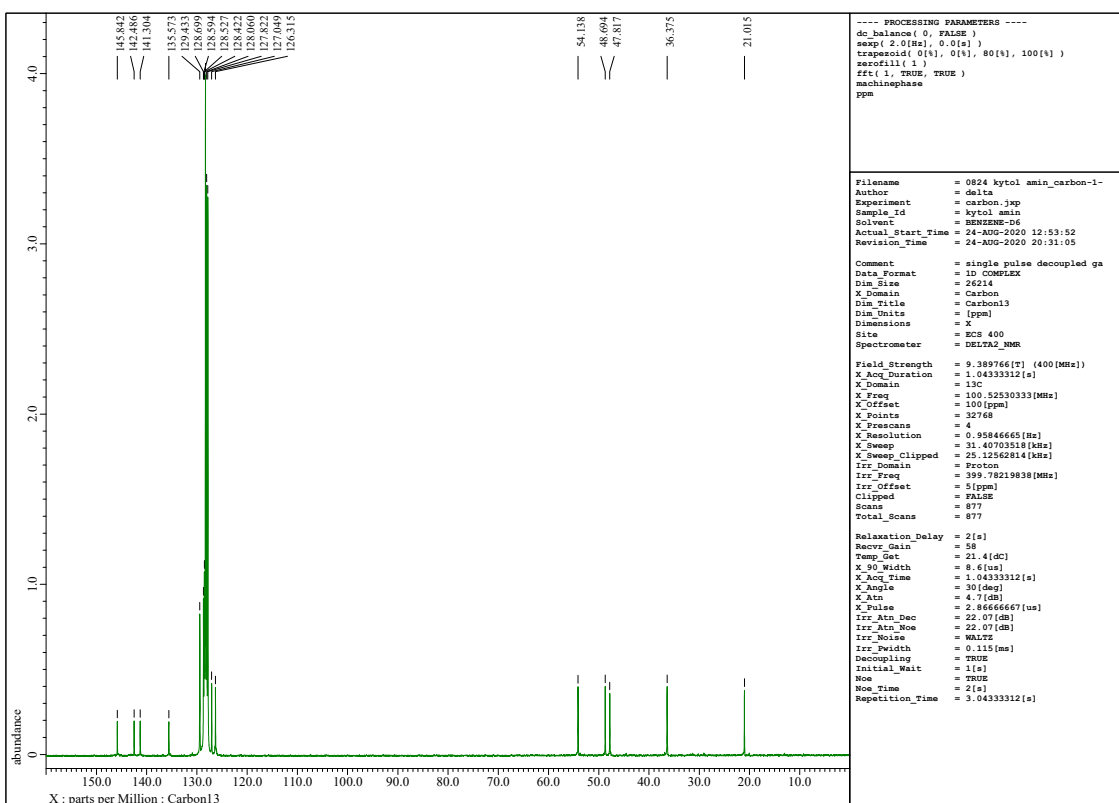

Supplement: d0ra08151e1.pdf [file d0ra08151e1.pdf]
